# Supplementary material for: Structural basis for activation of the growth hormone-releasing hormone receptor
Source: PubMed Central journal article supplement (PMC7567103; doi:10.1038/s41467-020-18945-0), 2020-10-15
Supplement: 41467_2020_18945_MOESM1_ESM.pdf [file 41467_2020_18945_MOESM1_ESM.pdf]

# Supplementary Information

## Structural basis for activation of the growth hormone-releasing hormone receptor

### Brief description of what this file includes:

Supplementary Fig 1. Stabilization of GHRHR-G<sub>s</sub> complex with NanoBiT.

Supplementary Fig 2. Purification and characterization of the GHRH-GHRHR-G<sub>s</sub>-Nb35 complex.

Supplementary Fig 3. Cryo-EM micrograph and 2D class averages of the GHRH-GHRHR-G<sub>s</sub> complex.

Supplementary Fig 4. Single-particle cryo-EM analysis and resolution of the cryo-EM map.

Supplementary Fig 5. Atomic-resolution model of the GHRH-GHRHR-G<sub>s</sub> complex in the cryo-EM density map.

Supplementary Fig 6. Sequence conservation analysis of GHRH and the peptide-binding pockets of GHRHR across diversified species.

Supplementary Fig 7. Functional role of the ECD.

Supplementary Fig 8. Comparison of peptide-binding modes among class B GPCRs.

Supplementary Fig 9. Structure comparison of GHRHR-G<sub>s</sub> interface with that of other class B GPCRs.

Supplementary Fig 10. Molecular dynamics (MD) simulation of GHRHR with disease-causing mutations.

Supplementary Table 1. Effects of GHRH-mediated cAMP accumulation.

Supplementary Table 2. Cryo-EM data collection, model refinement and validation statistics.

Supplementary Table 3. Interaction of GHRH N-terminal helix with TMD of GHRHR.

Supplementary Table 4. Effects of residue mutation in the ligand-binding pocket on GHRH-induced cAMP accumulation.

Supplementary Table 5. Summary of disease-causing missense mutations in GHRHR.

Supplementary Table 6. List of primers sequences for site-direct mutagenesis studies, related to Figs. 2, 4, 5, Supplementary Figs. 6, 8 and Supplementary Tables 4, 5.

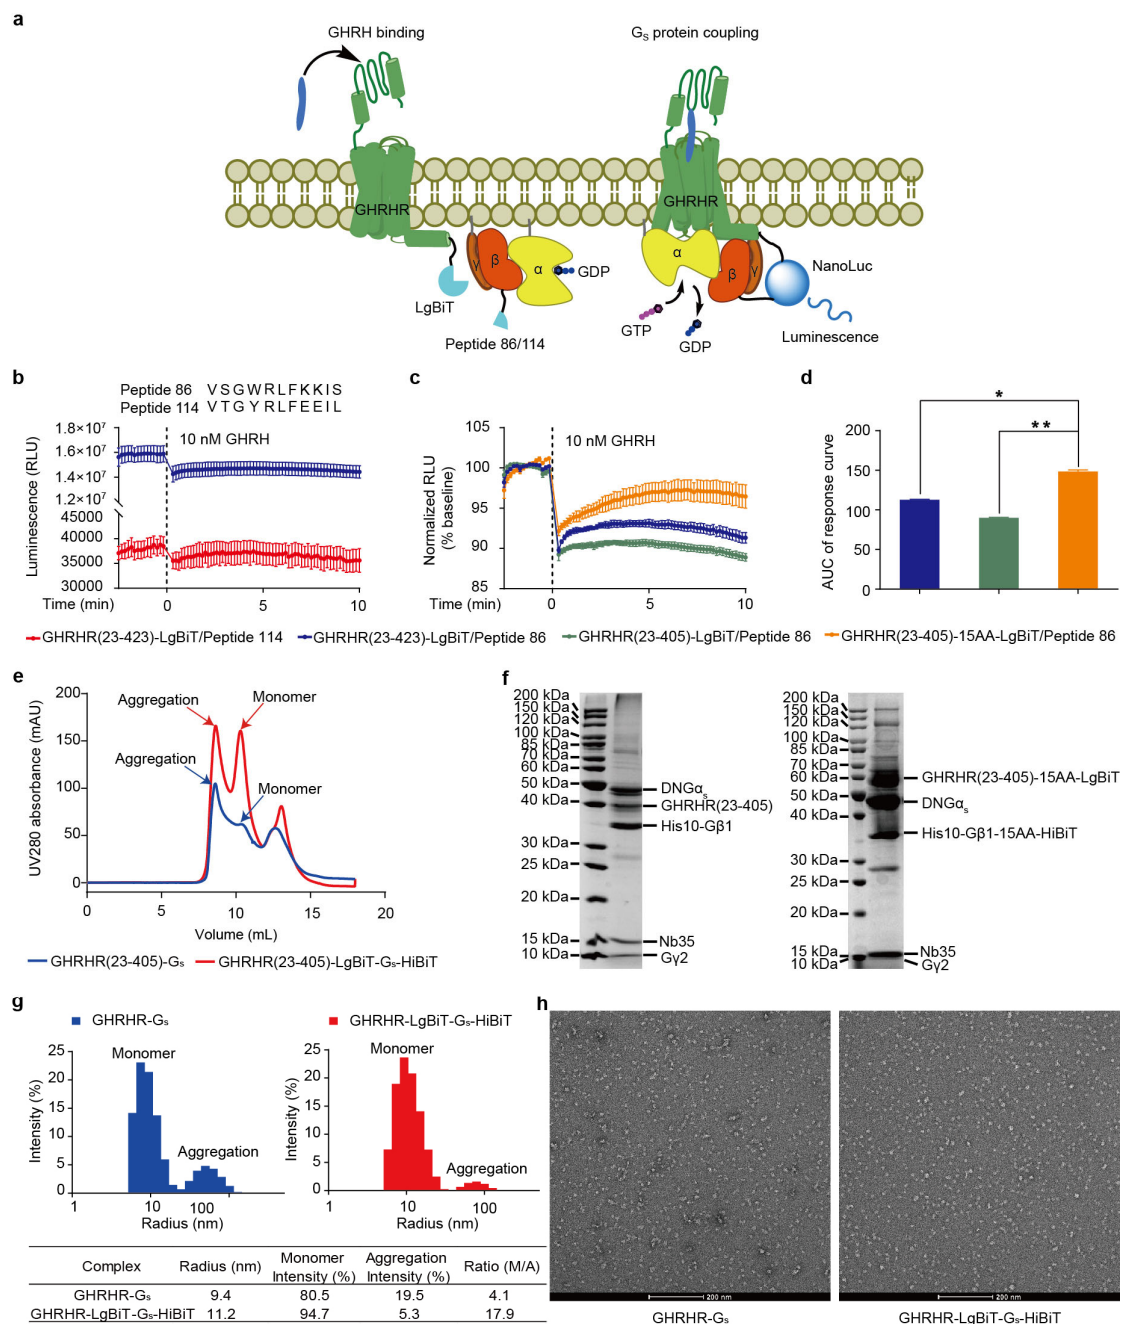

34

### 35 **Supplementary Figure 1. Stabilization of GHRHR-G<sub>s</sub> complex with NanoBiT.**

36 NanoBiT assay was designed to investigate the protein-protein interactions (PPIs)  
 37 based on protein-fragment complementation, and comprised of ~18 kDa LgBiT  
 38 and ~1.3 kDa SmBiT (peptide 114,  $K_D = 190 \mu\text{M}$ ) subunits which were split from  
 39 the NanoLuc, a small luciferase with high physical stability and sensitivity<sup>1, 2, 3</sup>. In  
 40 this assay system, PPIs would bring NanoBiT subunits (fused to the two interacted  
 41 proteins, respectively) to close proximity forming a functional luciferase and  
 42 giving a signal. The weak intrinsic affinity between LgBiT and peptide 114 will be  
 43 dramatically increased when SmBiT is replaced by another variant, peptide 86 ( $K_D$   
 44 = 700 pM)<sup>2</sup>. Taking advantage of this attribute, we designed a strategy that could  
 45 enhance the association of the GHRHR-G<sub>s</sub> protein complex through the high  
 46 intrinsic affinity of two subunits. By fusing peptide 86 to the C terminus of His10-

47 Gβ1 and LgBiT to that of the receptor with 15-amino acid linkers (Extended Data  
48 Fig. 1a), a stronger luminescence signal (Extended Data Fig. 1b) as well as a slower  
49 dissociation of receptor-G<sub>s</sub> complex were observed, respectively, compared to  
50 peptide 114 and other linkers between the receptor and LgBiT (Extended Data Fig.  
51 1c-d and Extended Data Table 1). The complex was therefore further stabilized by  
52 the interaction between LgBiT and SmBiT. **a**, Schematic of NanoBit subunits  
53 functioned during GHRH-GHRHR-G<sub>s</sub> complex formation. **b**, Top panel, the amino  
54 acid sequence of peptides 86 and 114; bottom panel, effect of two SmBiT peptides  
55 on the kinetics of complex formation detected by luminescence signal. **c**, Effect of  
56 LgBiT position on the kinetics of complex formation detected by luminescence  
57 signal. The dashed line indicates the time point of 10 nM GHRHR addition. **d**,  
58 Comparison of peptides 86 and 114 for enhancing complex association, quantified  
59 by AUC (0-10 min) of RLU response curve and normalized to the baseline. **e**,  
60 Respective size-exclusion chromatography elution profiles of the GHRHR-G<sub>s</sub> and  
61 GHRHR-LgBiT-G<sub>s</sub>-HiBiT complexes. The peaks for aggregation and monomer are  
62 indicated. **f**, SDS-PAGE analysis of the purified complexes concentrated from the  
63 monomeric fractions by Coomassie blue staining. This experiment was repeated  
64 independently twice with similar results. **g**, Upper panel, dynamic light scattering  
65 (DLS) size distribution histogram of GHRHR-G<sub>s</sub> and GHRHR-LgBiT-G<sub>s</sub>-HiBiT  
66 complexes. Lower panel, values of radius, percentage of intensity for monomer and  
67 aggregation, and ratios of monomer/aggregation (M/A). **h**, Representative negative  
68 staining images of the corresponding complexes. This experiment was repeated  
69 independently twice with similar results. Scale bar is 200 nm. Data are displayed  
70 as means ± S.E.M. of at least three independent experiments performed in  
71 duplicate. Statistical significance was determined with a two-tailed Student's *t*-  
72 test; \*P < 0.05, \*\*P < 0.01; AUC, area-under-the-curve; RLU, relative luminometer  
73 unit. Effects of NanoBiT tethering strategy on the stability of GHRHR-G<sub>s</sub> complex  
74 were investigated by gel filtration chromatography, SDS-PAGE, dynamic light  
75 scattering (DLS) and negative staining EM. It was found that using this approach, (i)  
76 the complex had a higher monomer peak distribution than that of wild-type (WT),  
77 indicative of an increased stability (**e**, **f**); (ii) monodispersity of complexes evaluated by  
78 DLS showed 4.3-fold increase in monomer (radius of ~10 nm)/aggregation (radius of  
79 ~100 nm) ratio compared to the WT (**g**); and (iii) improved integrity and homogeneity  
80 of complex particles were observed using negative staining (**h**). These results are  
81 consistent with previous studies on type 1 vasoactive intestinal polypeptide receptor  
82 (VIP1R) and CC chemokine receptor 7 (CCR7)<sup>4</sup>. Source data are provided as a  
83 Source Data file.

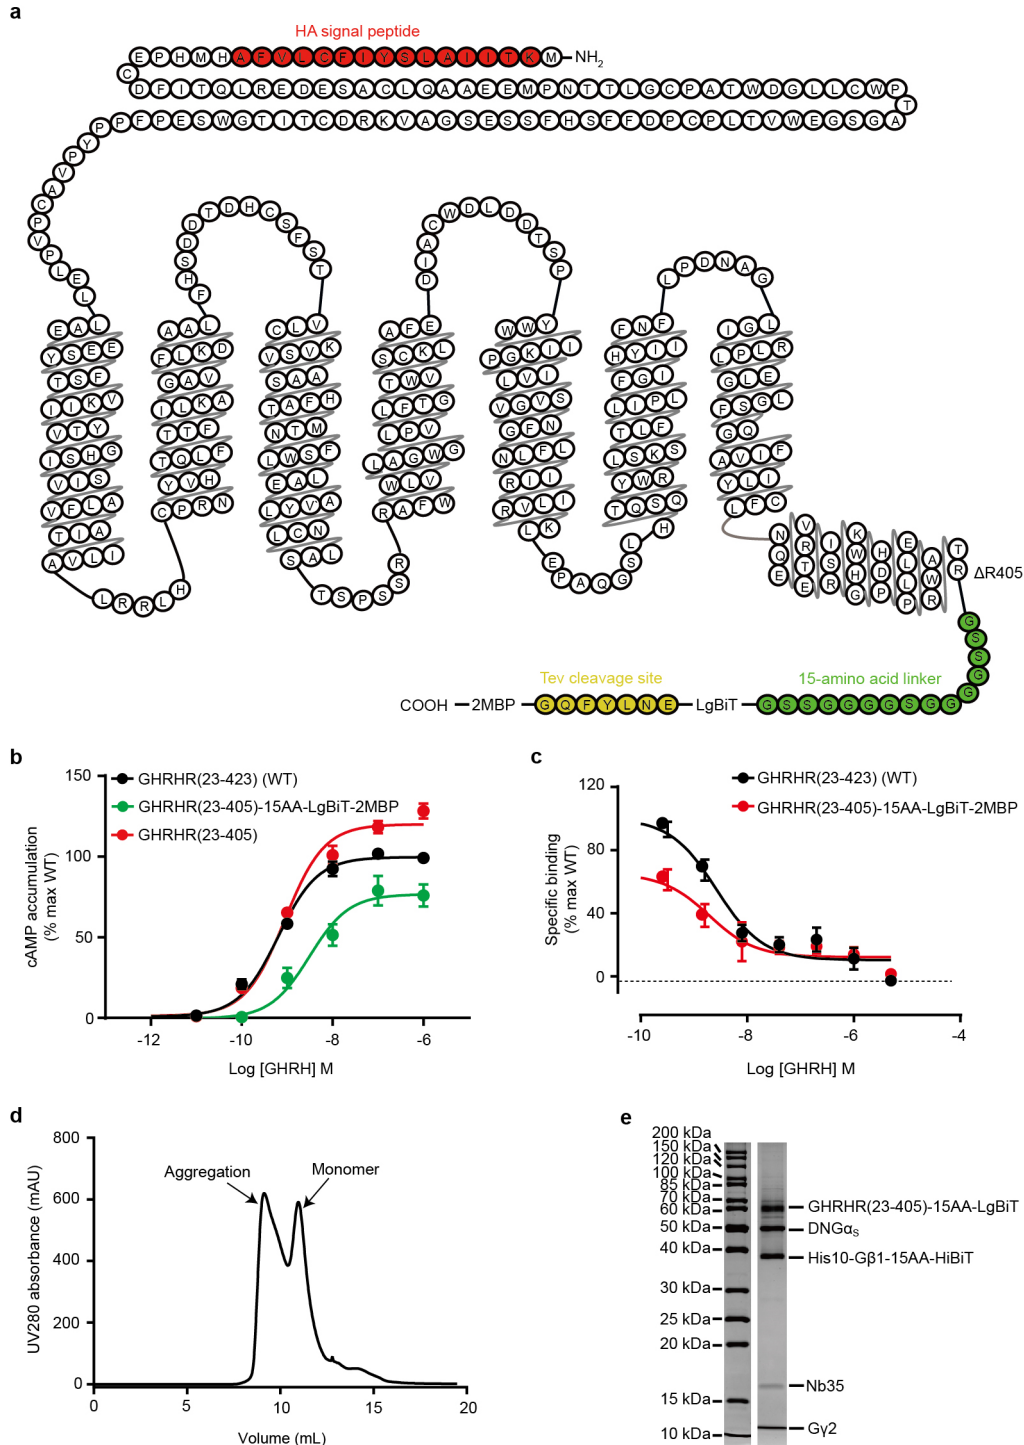

84

85 **Supplementary Figure 2. Purification and characterization of the GHRH-**  
 86 **GHRHR-G<sub>s</sub>-Nb35 complex.** **a**, Schematic of HA-GHRHR(23-405)-15AA-LgBiT-  
 87 Tev-2MBP construct used in the study. The HA signal peptide (red), 15-amino acid  
 88 (AA) linker (green), Tev cleavage site (yellow) and R405 truncation site are  
 89 highlighted and indicated. **b**, cAMP concentration-response curves for GHRHR(23-  
 90 423) (wild-type, WT, black), GHRHR(23-405) (red) and GHRHR(23-405)-15AA-  
 91 LgBiT-2MBP (green). Concentration-response curves for cAMP accumulation of  
 92 WT and mutant receptors were stimulated by GHRH in HEK 293T cells after 24 h



93 of transfection. Data are normalized by the WT receptor and fitted with a three-  
94 parameter logistic equation. All values are means  $\pm$  S.E.M. of at least three  
95 independent experiments conducted in quadruplicate (n = 8-10). **c**, Competitive  
96 inhibition of <sup>125</sup>I-GHRH binding by GHRH. Binding affinity is quantified by  
97 reduction of radioactivity (counts per minute, CPM) and normalized to the  
98 maximal response of WT receptor. Binding affinity data are fitted with a three-  
99 parameter logistic equation. All values are means  $\pm$  S.E.M. of at least three  
100 independent experiments (n = 7-8), conducted in duplicate. **d**, Representative size-  
101 exclusion chromatography elution profile of MBP-purified complex on Superdex  
102 200 Increase 10/300 column. The peaks of aggregation and monomer are  
103 indicated by arrows. **e**, SDS-PAGE analysis of the purified complex concentrated  
104 from the monomeric fraction by Coomassie blue staining. This experiment was  
105 repeated independently twice with similar results. Source data are provided as a  
106 Source Data file.

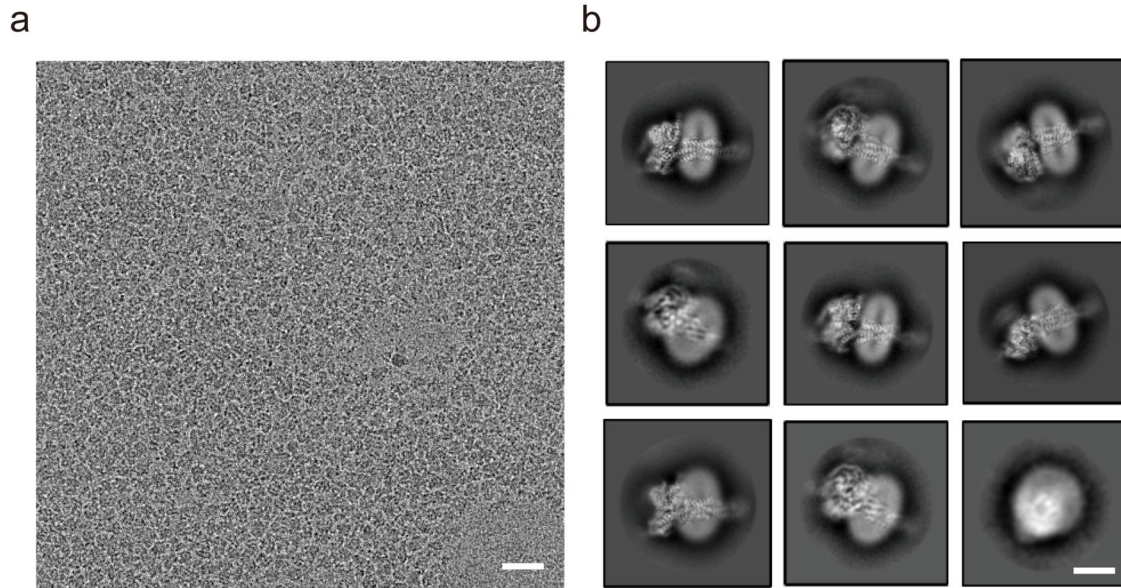

107

108

109 **Supplementary Figure 3. Cryo-EM micrograph and 2D class averages of the**

110 **GHRH-GHRHR-G<sub>s</sub> complex.** **a**, Representative cryo-EM micrograph of GHRH-

111 GHRHR-G<sub>s</sub> complex. Scale bar, 30 nm. **b**, Representative reference-free 2D class

112 averages. Scale bar, 5 nm. 2D, two-dimensional. This experiment was repeated

independently twice with similar results.

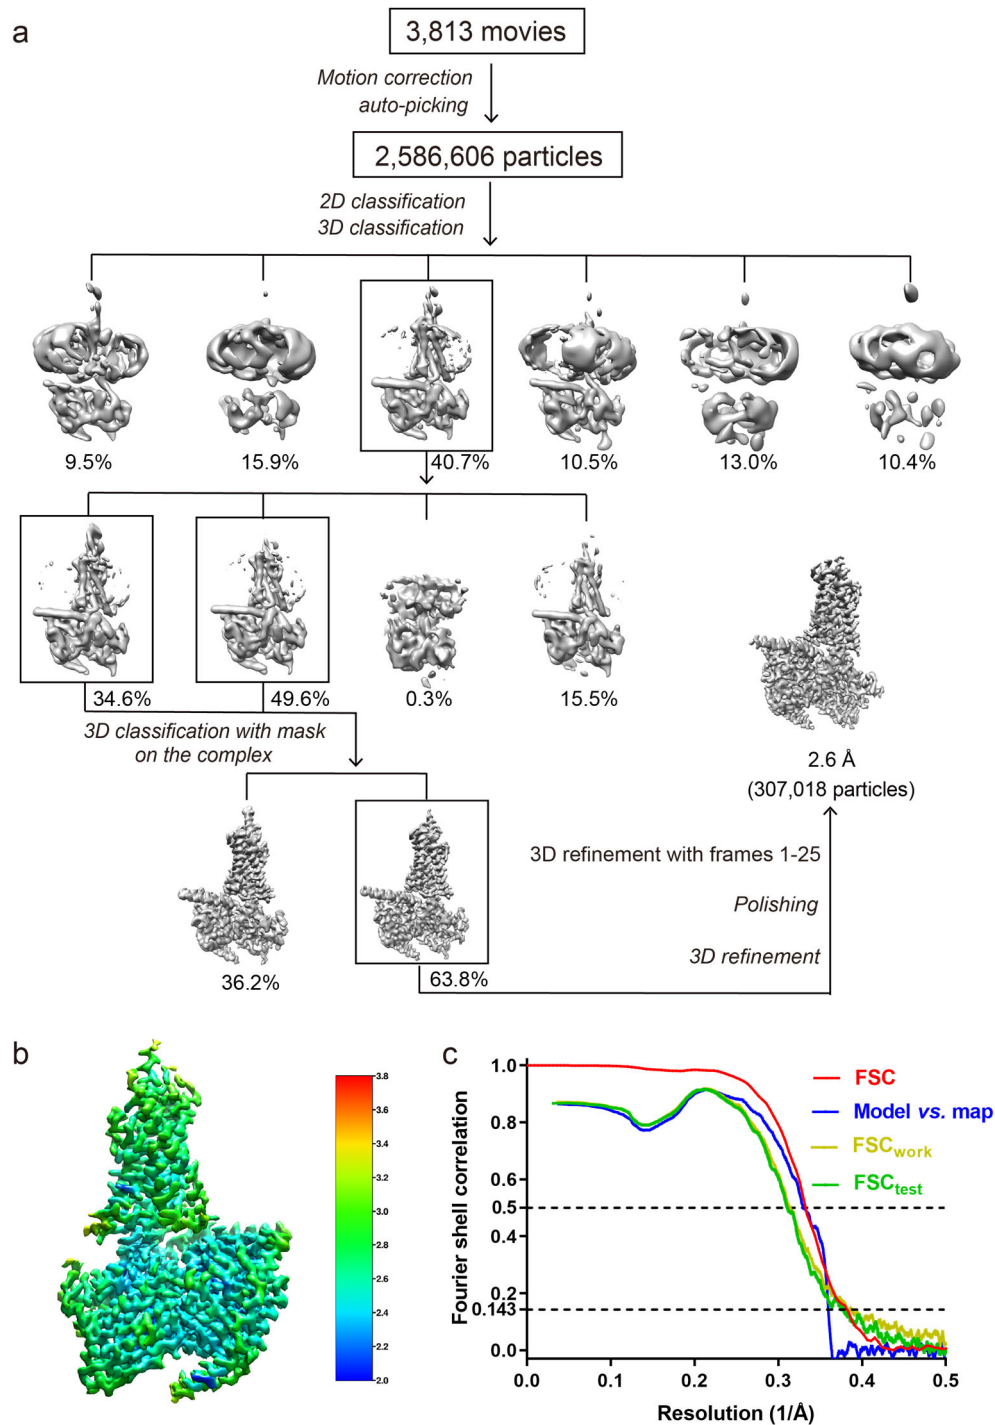

113

114 **Supplementary Figure 4. Single-particle cryo-EM analysis and resolution of**  
 115 **the cryo-EM map. a**, Flow chart of cryo-EM data processing. **b**, 3D density map  
 116 colored according to local resolution (Å). **c**, Gold-standard Fourier shell correlation  
 117 curve (red), FSC of the refined model vs. the map curve (blue) and FSC<sub>work</sub>/FSC<sub>test</sub>  
 118 validation curves (yellow and green, respectively). The resolutions at FSC=0.143 and  
 119 FSC=0.5 are indicated with dashed lines. 3D, three-dimensional.

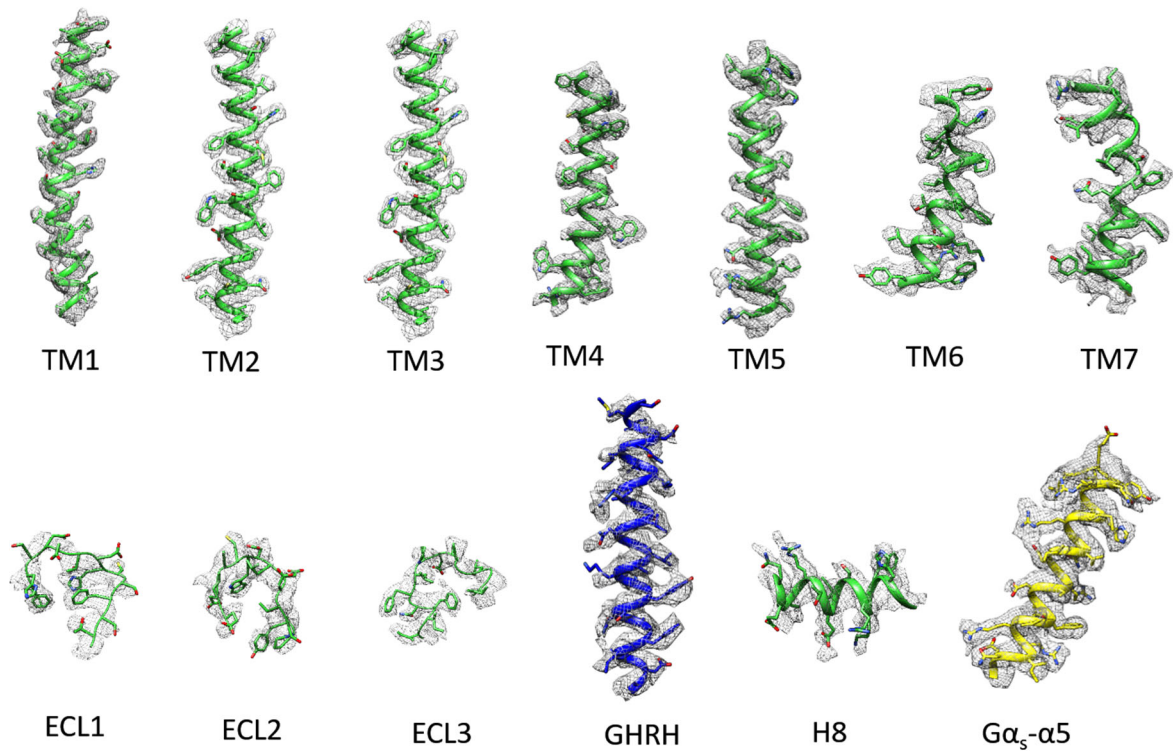

120

121

122

123

124

125

**Supplementary Figure 5. Atomic-resolution model of the GHRH-GHRHR-G $\alpha_s$  complex in the cryo-EM density map.** EM density map and model are shown for all seven-transmembrane  $\alpha$ -helix, ECL1-3, and helix 8 of GHRHR, GHRH peptide and the  $\alpha$ 5-helix of the G $\alpha_s$  Ras-like domain. The densities of most residues are clearly seen in the map.



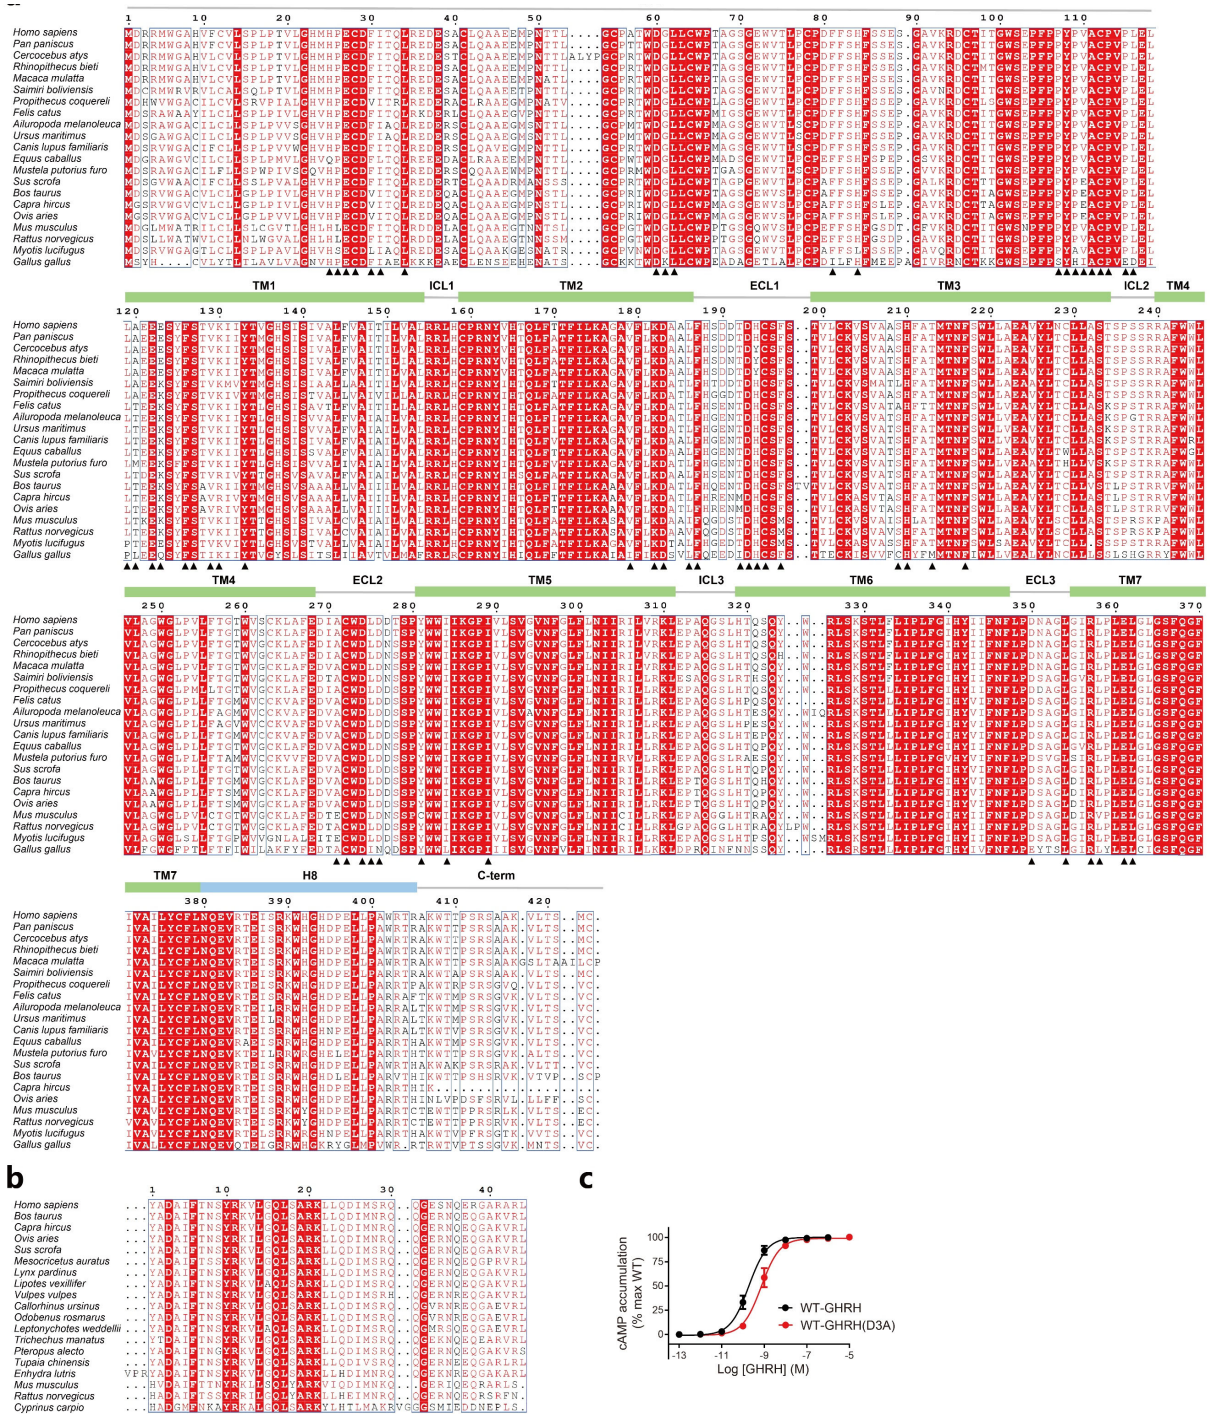

126

127 **Supplementary Figure 6. Sequence conservation analysis of GHRH and the**  
 128 **peptide-binding pockets of GHRHR across diversified species. a, Multiple**  
 129 **sequence alignment of GHRHR in 21 species. Residues within 5Å of GHRH are**  
 130 **highlighted by solid triangles. b, Multiple sequence alignment of GHRH in 19**  
 131 **species. c, Effect of GHRH mutant D3A on GHRHR-mediated cAMP accumulation.**  
 132 **Data are presented as mean values ± S.E.M. of four independent experiments (n =**  
 133 **4), conducted in quadruplicate. Source data are provided as a Source Data file.**  
 134

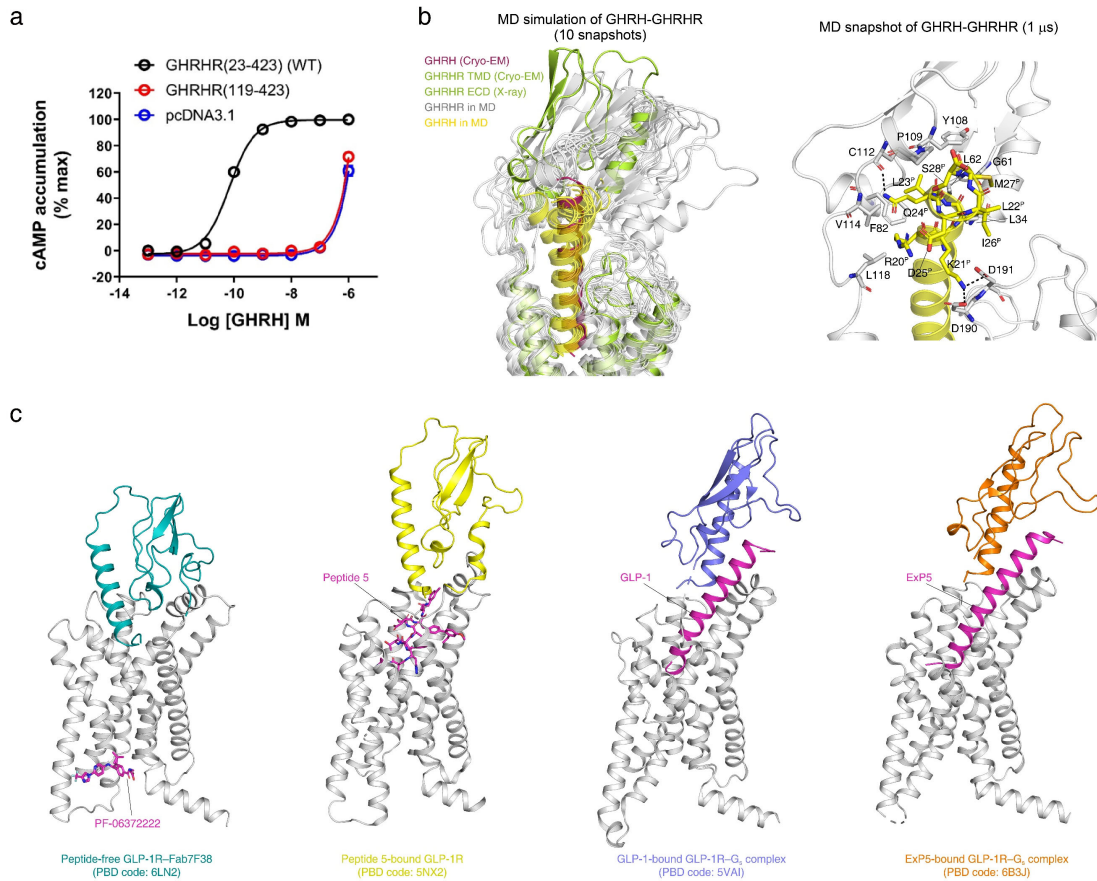

135

136 **Supplementary Figure 7. Functional role of the ECD.** **a**, Concentration-response  
 137 curves of GHRH in activating cAMP signaling in wild-type (WT) and ECD-truncated  
 138 human GHRHR expressing HEK 293T cells. Data shown are means  $\pm$  S.E.M. of three  
 139 independent experiments (n = 3), conducted in quadruplicate. **b**, MD simulation of  
 140 GHRHR bound with GHRH. Left, 10 snapshots from 1  $\mu$ s simulation trajectory were  
 141 extracted to present the dynamic conformations of GHRHR ECD. Right, molecular  
 142 recognition of the C-terminal region of GHRH by the ECD of GHRHR in the final  
 143 snapshot. **c**, Conformational comparison of GLP-1R ECD in different states<sup>5-8</sup>. G  
 144 proteins are omitted for clarity. All structures are superimposed on the cryo-EM  
 145 structure of the GLP-1-GLP-1R-G<sub>s</sub> complex using the heavy atoms of residues  
 146 A153<sup>1.48b</sup>-S163<sup>1.58b</sup> (TM1), I179<sup>2.49b</sup>-I196<sup>2.66b</sup> (TM2), V229<sup>3.32b</sup>-G248<sup>3.51b</sup> (TM3),  
 147 G273<sup>4.49b</sup>-P277<sup>4.53b</sup> (TM4), T353<sup>6.42b</sup>-I357<sup>6.46b</sup> (TM6), and Q394<sup>7.45b</sup>-Y402<sup>7.53b</sup> (TM7).  
 148 Source data are provided as a Source Data file.

149



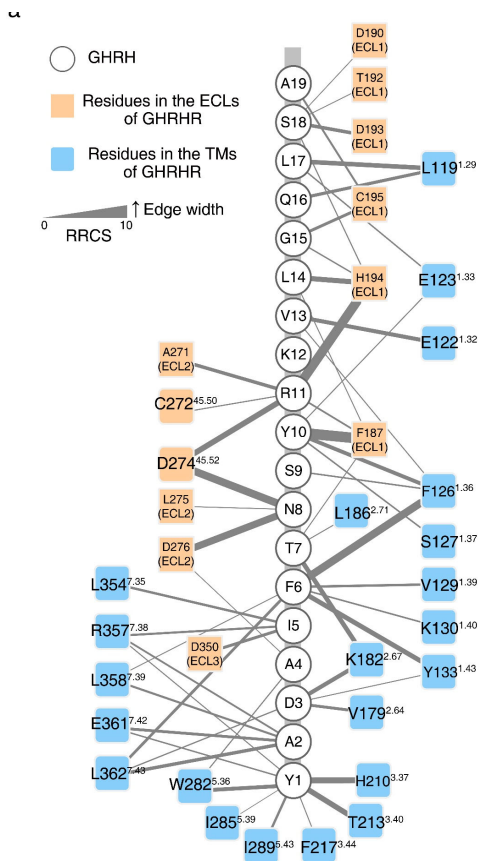

**b**

|             | 1        | 10       | 20      | 30                        |
|-------------|----------|----------|---------|---------------------------|
| GHRH        | ...YADAI | TNSYR    | RVVIGQ  | LSARKLLQDTMSRQOGESN       |
| GIP         | ...YAE   | GTFTISDY | SIAMDKI | HQQD                      |
| GLP-1(7-37) | ...HAE   | GTFTSDV  | SSYLEG  | QQLAAKFFIAWLVKGRG...      |
| GLP-2(1-33) | ...HAD   | GSFSD    | EMNTI   | LDNLAARDFINWLVKGRG...     |
| GLP-2(3-33) | ...HAD   | GSFSD    | EMNTI   | LDNLAARDFINWLVKGRG...     |
| PACAP38     | ...HSD   | GIFTDSY  | SRVYR   | KQMAVKKYLAAVLGGKRYKQRV    |
| PACAP(1-27) | ...HSD   | GIFTDSY  | SRVYR   | KQMAVKKYLAAVLGGKRYKQRV    |
| VIP         | ...HSD   | AVFTD    | NYTR    | LRKQMAVKKYLAAVLGGKRYKQRV  |
| PHM         | ...HAD   | GVFTS    | DFSK    | LLGQLSARKKYLESLM...       |
| PHV         | ...HAD   | GVFTS    | DFSK    | LLGQLSARKKYLESLM...       |
| secretin    | ...HSD   | GIFT     | SEL     | SRLREGARLQRLLQGLV...      |
| glucagon    | ...HSD   | GGTFT    | SDYS    | SKYLD                     |
| TIP39       | SLALAD   | DAAF     | FRER    | ARLLAA                    |
| PTH         | ...SVS   | EIQ      | LMHNL   | GKHLNSMERVEWLRKLLQDVHNFVA |
| PTHrP       | ...AVS   | EHQL     | LHDK    | KSLLQD                    |

**c**

|       | ECL1        |           |              |      | ECL2 |    |     |          |
|-------|-------------|-----------|--------------|------|------|----|-----|----------|
| GHRHR | FHSDDTD     | ...       | HCSFST       | DIA  | ...  | LD | ... | LD       |
| GIPR  | PRPGPYLGDQ  | ...       | ALALWNQAL    | NTQ  | ...  | WE | ... | RNEVKA   |
| GLP1R | KWMYSTAAQQH | ...       | QWDGLLSYQDS  | DEG  | ...  | WT | ... | RNSNMN   |
| GLP2R | YNSYSKRPDNE | ...       | NGWMSYLSSEMS | NTG  | ...  | WT | ... | TNGNKK   |
| PAC1R | YAEQDSN     | ...       | HCFIST       | DTG  | ...  | WD | ... | MNDSTA   |
| VIPR1 | FDSSGESD    | ...       | QCSEGS       | DYG  | ...  | WD | ... | TINSS    |
| VIPR2 | YSSSGTLH    | ...       | CPDQSSW      | DTG  | ...  | WD | ... | TNDHSV   |
| SCTR  | FSSDDVT     | ...       | YCDADR       | DVG  | ...  | WD | ... | TANANAS  |
| GCCR  | QKIGDDL     | ...       | VSTWLSDG     | NVQ  | ...  | WT | ... | SND      |
| PTH1R | LDEAERL     | TEELRAIAQ | APPPATAAA    | NTG  | ...  | WD | ... | LSSGN    |
| PTH2R | VKELES      | LIMQDDP   | QNSIEATSVDKS | DAR  | ...  | WE | ... | LSAGD    |
| CALCR | VPNGEL      | ...       | VRRDP        | NDN  | ...  | WL | ... | SVETHL   |
| CALRL | ANNQAL      | ...       | VATNP        | YNDN | ...  | WI | ... | SSDTH    |
| CRF1R | MSPEV       | ...       | HQSN         | NEK  | ...  | WF | ... | FGKRPVY  |
| CRF2R | DHEV        | ...       | HESN         | NEQ  | ...  | WF | ... | FGKEPGLD |

**c**

|       | ECL3 |     |    |    |
|-------|------|-----|----|----|
| GHRHR | LEEF | ... | VK | YV |
| GIPR  | FQRL | ... | LQ | YR |
| GLP1R | ELLL | ... | LY | VK |
| GLP2R | NRYL | ... | LQ | YV |
| PAC1R | TQDY | ... | LK | YV |
| VIPR1 | DQTY | ... | LK | YV |
| VIPR2 | DKIY | ... | LK | YV |
| SCTR  | NRHL | ... | LK | YV |
| GCCR  | QVAY | ... | FO | YV |
| PTH1R | EEER | ... | FD | LY |
| PTH2R | SKQF | ... | EL | LY |
| CALCR | TKL  | ... | AY | LY |
| CALRL | TKV  | ... | AL | LY |
| CRF1R | ESKY | ... | H  | AV |
| CRF2R | QYDY | ... | R  | AL |

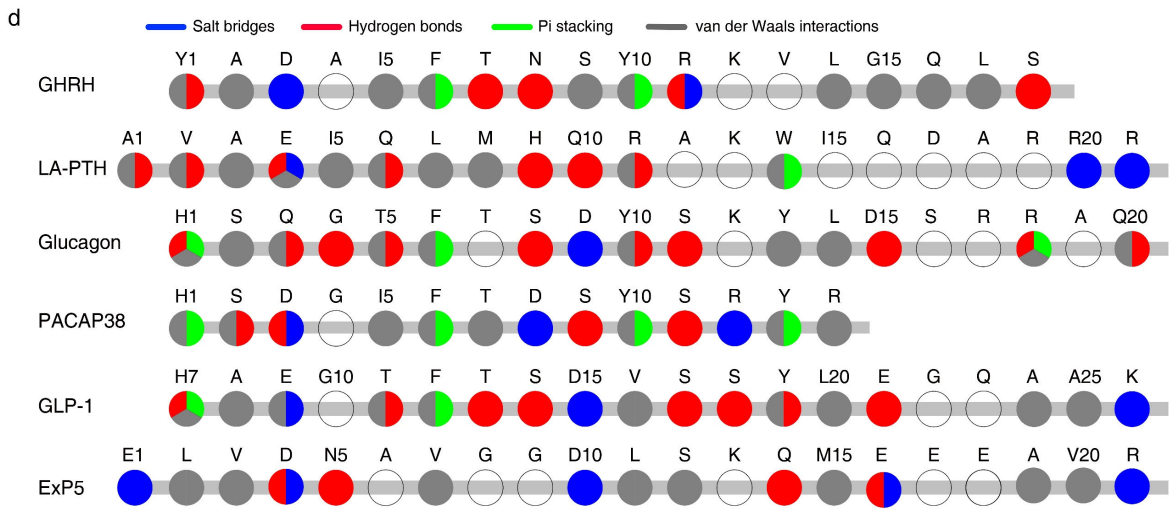

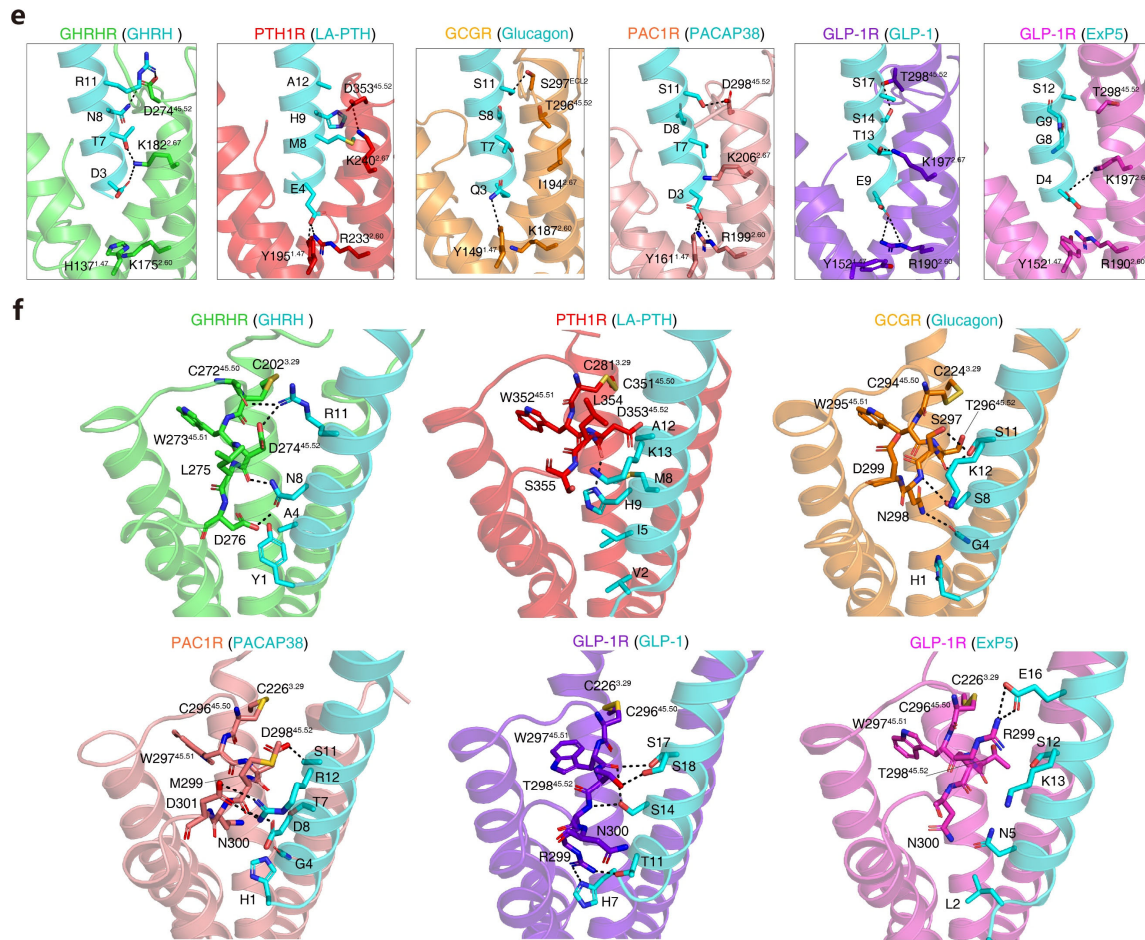

152

153

**Supplementary Figure 8. Comparison of peptide-binding modes among class**

**B GPCRs. a**, Packing interactions between GHRH and GHRHR, with the line

155 thickness representing the residue-residue contact core (RRCS)<sup>9</sup>. **b**, Sequence

156 alignment of class B GPCR peptide hormones, residue numbers are shown based

157 on GHRH. **c**, Sequence alignment in the peptide-binding pockets among 15 class B

158 GPCRs. Residue numbers are shown based on GHRHR, with class B GPCR

159 numbers<sup>10, 11</sup> on the top. The complementary residue interactions between GHRH

160 and GHRHR (Tyr<sup>1P</sup>-H210<sup>3,37</sup>, Tyr<sup>1P</sup>-T213<sup>3,40</sup>, Asp<sup>3P</sup>-K182<sup>2,67</sup>, Phe<sup>6P</sup>-F126<sup>1,36</sup>, Asn<sup>8P</sup>-

161 D274<sup>45,52</sup>, Asn<sup>8P</sup>-D276<sup>ECL2</sup>, Arg<sup>11P</sup>-D274<sup>45,52</sup> and Arg<sup>11P</sup>-H194<sup>ECL1</sup>), different from

162 other class B GPCR-peptide pairs, may be responsible for GHRH specificity. **d**, The

163 peptide recognition modes are described by fingerprint strings encoding different

164 interaction types of the surrounding residues in each receptor. Color codes are

165 listed on the top panel. **e** and **f**, Diversified forms of peptide recognition among

166 class B GPCRs. Despite a conserved Asp/Glu near the N terminus, peptides form

167 receptor- and peptide-specific polar networks between TM1, TM2 and ECL2 as

168 well as among themselves by adjusting distinct orientations of side chains. Five

169 peptide-bound receptor-G protein complexes were adopted in peptide-binding

170 mode analysis: LA-PTH-bound PTH1R (PDB: 6NBF), GLP-1-bound GLP-1R (PDB:

171 5VAI), Exp5-bound GLP-1R (PDB: 6B3J), glucagon-bound GCGR (PDB: 6LMK) and

172 PACAP38-bound PAC1R (PDB: 6P9Y).

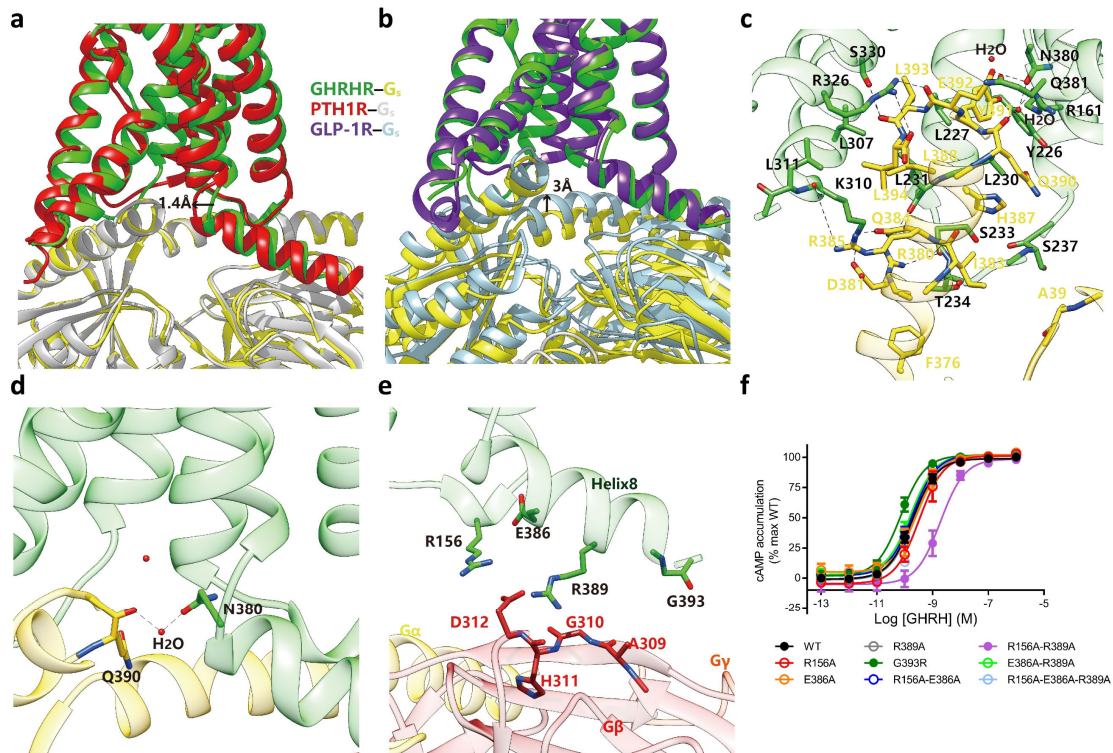

173

174 **Supplementary Figure 9. Structure comparison of GHRHR-G<sub>s</sub> interface with**  
 175 **that of other class B GPCRs. a and b**, comparison of interaction mode between  
 176 different class B GHRHR-G<sub>s</sub> complexes. GHRHR-G<sub>s</sub>, lime green-yellow; PTH1R-G<sub>s</sub>,  
 177 grey-light green; GLP-1R-G<sub>s</sub>, gold-cyan. **c**, GHRHR-G<sub>s</sub> interface, including Gα<sub>s</sub> α5-  
 178 GHRHR helix 8 interface. **d**, the hydrogen bond between GHRHR and Gα<sub>s</sub> mediated  
 179 by water. GHRHR, lime green; Gα<sub>s</sub>, yellow; and Gβ, red. **e**, the electrostatic  
 180 interaction network in the interface of GHRHR and Gβ. **f**, Representative effects of  
 181 GHRHR-G<sub>s</sub> interface mutations on the G<sub>s</sub>-mediated cAMP accumulation. Data are  
 182 presented as mean values ± S.E.M. of at least three independent experiments (n =  
 183 3–9), conducted in quadruplicate. Source data are provided as a Source Data file.



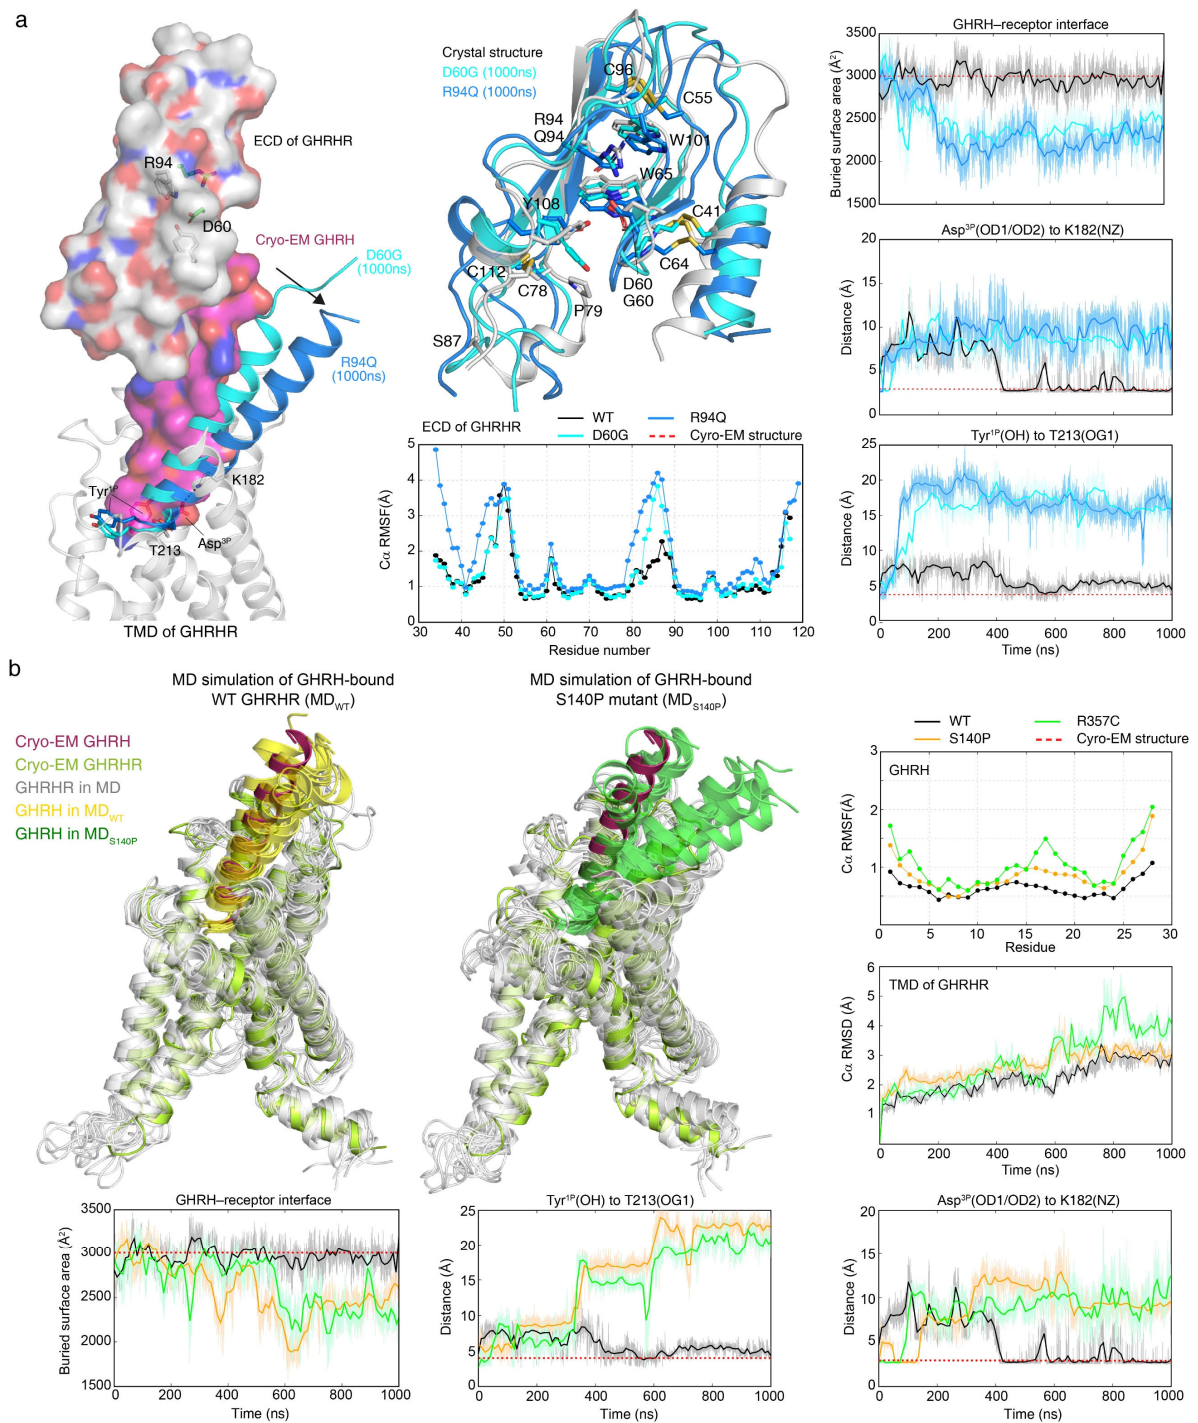

184

185 **Supplementary Figure 10. Molecular dynamics (MD) simulation of GHRHR**  
 186 **with disease-causing mutations.** **a**, MD simulation of two disease-caused  
 187 mutations on the GHRHR ECD, R94Q and D60G. The relative movement (root  
 188 mean square deviation, RMSF) of the C $\alpha$  positions of the GHRHR ECD, the buried  
 189 surface area between GHRH and the receptor, and two distances between  
 190 specified atoms from the residues on the N-terminal of GHRH and the receptor  
 191 TMD region are shown. To evaluate the stability of ECD, all snapshots obtained  
 192 from MD simulations were superimposed on the crystal structure of GHRHR ECD  
 193 (PDB accession: 2XDG) and the last 500 ns trajectories were sent to RMSF

194 calculation. During the MD simulation of WT GHRHR, the N terminus of GHRH  
195 consistently interacted with the TMD core, in line with the cryo-EM structure,  
196 evidenced by the buried surface areas of GHRH-receptor interface and atomic  
197 distances of two pairs, Tyr<sup>1P</sup>(OG1)-T213(OG1) and Asp<sup>3P</sup>(OD1/OD2)-K182(NZ).  
198 The orientation of ECD relative to TMD was variable in the simulation, consistent  
199 with previous reports on PTH1R<sup>12</sup> and GLP-1R<sup>8</sup>. Compared to the WT, GHRHR  
200 mutants R94Q and D60G had a structurally less stable ECD because of the  
201 abolished salt bridge between R94 and D60. Consequently, the second and short  
202  $\alpha$ -helix (residues 79 to 87) was disordered and lost its compact with the C  
203 terminus of GHRH. The decreased interface area and elimination of essential  
204 interaction between the N terminus of GHRH and the receptor TMD core suggest  
205 that these two mutants may have both weakened binding affinity and reduced  
206 potency for GHRH. **b**, MD simulation of two disease-caused mutations on GHRHR  
207 TMD, S140P and R357C. MD snapshots were superimposed on the cryo-EM  
208 structure of GHRHR TMD using the C $\alpha$  atoms of residues A120<sup>1.30b</sup>-L154<sup>1.64b</sup>  
209 (TM1), C159<sup>2.44b</sup>-L186<sup>2.71b</sup> (TM2), V200<sup>3.27b</sup>-A232<sup>3.59b</sup> (TM3), R240<sup>4.40b</sup>-F267<sup>4.67b</sup>  
210 (TM4), W282<sup>5.36b</sup>-L311<sup>5.65b</sup> (TM5), Q323<sup>6.34b</sup>-F347<sup>6.58b</sup> (TM6), and G355<sup>7.36b</sup>-  
211 L379<sup>7.60b</sup> (TM7). Ten snapshots from 1  $\mu$ s MD simulation trajectories were exacted  
212 to present the dynamic conformations of GHRHR (WT) and GHRHR mutant (S140P)  
213 and the receptor ECD was hidden. The relative movement of the C $\alpha$  positions of  
214 GHRH, the root mean square deviation (RMSD) of the C $\alpha$  positions of the GHRHR  
215 TMD, the buried surface area between GHRH and the receptor, and two distances  
216 between specified atoms from the residues on the N-terminal of GHRH and the  
217 receptor TMD region are shown. Different from the stable orientation of GHRH  
218 inserted into WT TMD core, mutants S120P and R357C first disrupted the salt  
219 bridge (Asp<sup>3P</sup>-K182) and hydrogen bond (Tyr<sup>1P</sup>-T213) with the N terminus of  
220 GHRH, then the C terminus of GHRH was released to twist, and finally, the overall  
221 buried surface between GHRH and the receptor decreased significantly, indicative  
222 of reduced ligand potency.

**Supplementary Table 1.** Effects of GHRH-mediated cAMP accumulation.

| Receptor                          | cAMP              |                         | Cell surface expression | Binding           |
|-----------------------------------|-------------------|-------------------------|-------------------------|-------------------|
|                                   | pEC <sub>50</sub> | E <sub>max</sub> (% WT) | (% WT)                  | pIC <sub>50</sub> |
| GHRHR(23-423) (WT)                | 9.20±0.10         | 100                     | 100                     | 8.56±0.17         |
| GHRHR(23-405)                     | 9.06±0.05         | 120.55±1.97*            | 86.97±6.28              | ND                |
| GHRHR(23-405)-15AA<br>-LgBit-2MBP | 8.54±0.13*        | 78.82±10.52*            | 53.92±6.37*             | 9.056±0.09        |

224 cAMP accumulation data were analyzed using a three-parameter logistic equation  
 225 to determine pEC<sub>50</sub> and E<sub>max</sub> values. pEC<sub>50</sub> is the negative logarithm of the molar  
 226 concentration of agonist that induced half the maximal response. Cell surface  
 227 expression was assessed by FACS to detect the N-terminal Flag epitope label [Anti-  
 228 Flag antibody (Sigma-Aldrich, 1:300); Donkey anti-Mouse Alexa Fluor 488-  
 229 conjugated secondary antibody, (ThermoFisher Scientific, 1:1000)] on the  
 230 receptor and normalized to the wild-type (WT) GHRHR (shown as percentage).  
 231 Binding data were analyzed using a three-parameter logistic equation to  
 232 determine pIC<sub>50</sub> values. All data shown are means ± S.E.M. of at least three  
 233 independent experiments. One-way ANOVA and Dunnett's post-test were used to  
 234 determine statistical difference. \*P<0.01; ND, not determined.



235 **Supplementary Table 2.** Cryo-EM data collection, model refinement and validation  
 236 statistics.

| <b>GHRH-GHRHR-G<sub>s</sub></b>                     |             |
|-----------------------------------------------------|-------------|
| <b>Data collection and processing</b>               |             |
| Magnification                                       | 4,9310      |
| Voltage (kV)                                        | 300         |
| Electron exposure (e <sup>-</sup> /Å <sup>2</sup> ) | 62          |
| Defocus range (µm)                                  | -0.5 ~ -2.5 |
| Pixel size (Å)                                      | 1.014       |
| Symmetry imposed                                    | C1          |
| Initial particle projections (no.)                  | 2,586,606   |
| Final particle projections (no.)                    | 307,018     |
| Map resolution (Å)                                  | 2.6         |
| FSC threshold                                       | 0.143       |
| Map resolution range (Å)                            | 2.1-4.0     |
| <b>Refinement</b>                                   |             |
| Initial model used                                  | 6NBF        |
| Model resolution (Å)                                | 2.7         |
| FSC threshold                                       | 0.143       |
| Model resolution range (Å)                          | 2.2-4.0     |
| Map sharpening <i>B</i> factor (Å <sup>2</sup> )    | -99.27      |
| Model composition                                   |             |
| Non-hydrogen atoms                                  | 8337        |
| Protein residues                                    | 1046        |
| Water                                               | 3           |
| Lipids                                              | 3           |
| <i>B</i> factors (Å <sup>2</sup> )                  |             |
| Protein                                             | 60.58       |
| Water                                               | 67.38       |
| Lipids                                              | 68.86       |
| RMSD                                                |             |
| Bond lengths (Å)                                    | 0.004       |
| Bond angles (°)                                     | 0.622       |
| Validation                                          |             |
| MolProbity score                                    | 1.54        |
| Clashscore                                          | 6.26        |
| Rotamer outliers (%)                                | 0.00        |
| Ramachandran plot                                   |             |
| Favored (%)                                         | 96.78       |
| Allowed (%)                                         | 3.22        |
| Disallowed (%)                                      | 0           |

237 RMSD, root-mean-square deviation.

238  
239

**Supplementary Table 3.** Interaction of GHRH N-terminal helix with TMD of GHRHR.

| GHRH <sup>13</sup> | GHRHR                   | Interaction                          |
|--------------------|-------------------------|--------------------------------------|
| Tyr1               | His210 <sup>3.37b</sup> | Side chain -side chain hydrogen bond |
|                    | Thr213 <sup>3.40b</sup> | Hydrophobic interaction              |
|                    | Trp282 <sup>5.36b</sup> |                                      |
| Ala2               | Glu361 <sup>7.42b</sup> | Backbone-side chain hydrogen bond    |
|                    | Arg357 <sup>7.38b</sup> | Hydrophobic interaction              |
|                    | Leu358 <sup>7.39b</sup> |                                      |
|                    | Glu361 <sup>7.42b</sup> |                                      |
| Asp3               | Leu362 <sup>7.43b</sup> |                                      |
|                    | Val179 <sup>2.64b</sup> | Hydrophobic interaction              |
| Ile5               | Lys182 <sup>2.67b</sup> | Electrostatic interaction            |
|                    | Asp350 <sup>ECL3</sup>  | Hydrophobic interaction              |
|                    | Leu354 <sup>7.35b</sup> |                                      |
| Phe6               | Arg357 <sup>7.38b</sup> |                                      |
|                    | Phe126 <sup>1.36b</sup> | Hydrophobic interaction              |
|                    | Val129 <sup>1.39b</sup> |                                      |
|                    | Tyr133 <sup>1.43b</sup> |                                      |
| Thr7               | Leu362 <sup>7.43b</sup> |                                      |
| Asn8               | Lys182 <sup>2.67b</sup> | Side chain -side chain hydrogen bond |
|                    | Asp276 <sup>ECL2</sup>  | Side chain -side chain hydrogen bond |
| Ser9               | Asp274 <sup>ECL2</sup>  | Backbone-side chain hydrogen bond    |
|                    | Phe126 <sup>1.36b</sup> | Hydrophobic interaction              |
| Tyr10              | Phe126 <sup>1.36b</sup> | Hydrophobic interaction              |
|                    | Phe187 <sup>ECL1</sup>  | $\pi$ - $\pi$ stack                  |
|                    | Phe187 <sup>ECL1</sup>  | Hydrophobic interaction              |
| Arg11              | His194 <sup>ECL1</sup>  | Side chain -side chain hydrogen bond |
|                    |                         | Backbone-side chain hydrogen bond    |
|                    | Ala271 <sup>ECL2</sup>  | Backbone-side chain hydrogen bond    |
|                    | Cys272 <sup>ECL2</sup>  | Hydrophobic interaction              |
|                    | Asp274 <sup>ECL2</sup>  | Electrostatic interaction            |
| Val13              | Glu122 <sup>1.32b</sup> | Side chain -side chain hydrogen bond |
| Leu14              | His194 <sup>ECL1</sup>  | Hydrophobic interaction              |
| Gly15              | His194 <sup>ECL1</sup>  | Hydrophobic interaction              |
|                    | Cys195 <sup>ECL1</sup>  |                                      |
| Gln16              | Leu119 <sup>1.29b</sup> | Hydrophobic interaction              |
| Leu17              | Leu119 <sup>1.29b</sup> | Hydrophobic interaction              |
|                    | Glu123 <sup>1.33b</sup> |                                      |
| Ser18              | Asp193 <sup>ECL1</sup>  | Backbone-side chain hydrogen bond    |

240  
241

Residues within 4 Å are shown.

242 **Supplementary Table 4.** Effects of residue mutation in the ligand-binding pocket  
 243 on GHRH-induced cAMP accumulation.

| Mutants   | cAMP                   |                         | Cell surface expression (% WT) |
|-----------|------------------------|-------------------------|--------------------------------|
|           | pEC <sub>50</sub> ±SEM | E <sub>max</sub> (% WT) |                                |
| Wild-type | 9.74±0.17              | 100                     | 100                            |
| L119A     | 9.14±0.05              | 98.67±1.48              | 87.93±3.90                     |
| E122A     | 9.96±0.15              | 98.38±3.26              | 75.6±4.21                      |
| E123A     | 10.14±0.06             | 100.33±1.34             | 100.1±5.86                     |
| F126A     | 8.96±0.12*             | 98.92±0.84              | 91.04±6.38                     |
| V129A     | 6.78±0.08*             | 24.33±6.11*             | 1.75±0.50*                     |
| V179A     | 9.54±0.28              | 101.24±3.06             | 95.09±7.62                     |
| K182A     | 7.40±0.06*             | 100.02±1.40             | 43.75±6.15*                    |
| F187A     | 8.94±0.26*             | 101.68±1.52             | 120.7±3.89                     |
| T192A     | 9.64±0.03              | 103.11±1.18             | 104.2±6.58                     |
| D193A     | 9.94±0.20              | 101.42±1.02             | 99.3±4.76                      |
| H194A     | 9.60±0.04              | 98.01±1.25              | 93.96±5.54                     |
| C195A     | 7.67±0.06*             | 95.22±1.05              | 84.21±6.09                     |
| S209A     | 9.96±0.03              | 100.52±0.43             | 88.94±9.95                     |
| H210A     | 9.00±0.19              | 99.66±1.10              | 50.06±5.88*                    |
| T213A     | 9.35±0.06              | 91.48±4.55              | 27.22±5.06*                    |
| A271R     | 9.98±0.12              | 100.81±1.19             | 97.44±7.87                     |
| A271F     | 9.73±0.19              | 103.70±0.64             | 69.29±4.50*                    |
| D274A     | 9.33±0.04              | 99.78±2.32              | 76.04±7.79                     |
| D276A     | 9.48±0.06              | 102.04±0.51             | 95.71±6.47                     |
| W282A     | 7.88±0.24*             | 101.88±5.62             | 126.3±6.195                    |
| K286A     | 8.81±0.21*             | 98.61±1.91              | 98.63±19.65                    |
| I285A     | 7.18±0.34*             | 102.00±0.20             | 6.44±0.66*                     |
| I289A     | 8.01±0.17*             | 93.36±2.36              | 5.59±0.85*                     |
| N346A     | 8.85±0.27*             | 101.21±3.69             | 97.97±4.84                     |
| D350A     | 6.83±0.13*             | 47.38±8.48*             | 8.78±2.69*                     |
| L354A     | 9.74±0.10              | 98.79±1.84              | 105±7.02                       |
| R357A     | 6.87±0.09*             | 60.05±5.19*             | 100.9±8.42                     |
| L358A     | 8.98±0.13              | 100.3±1.21              | 121±8.64                       |
| E361A     | 8.98±0.23              | 18.75±4.38*             | 8.70±0.92*                     |
| L362A     | 9.95±0.15              | 103.97±0.47             | 125.10±33.92                   |

244 cAMP accumulation data were analyzed using a three-parameter logistic equation  
 245 to determine pEC<sub>50</sub> and E<sub>max</sub> values. E<sub>max</sub> values for mutants are expressed as a  
 246 percentage of the wild-type (WT). Cell surface expression was assessed by FACS to  
 247 detect the N-terminal Flag epitope label on the receptor and normalized to the WT  
 248 GHRHR (shown as percentage). All data are means ± S.E.M. of at least three  
 249 independent experiments. One-way ANOVA was used to determine statistical  
 250 significance (\*P < 0.01). NS, not saturable.

**Supplementary Table 5.** Summary of disease-causing missense mutations in GHRHR.

| Variant ID or PMID | Mutation        | Genotype                  | Position   | Disease                               | Validated functional data                                                                                                |
|--------------------|-----------------|---------------------------|------------|---------------------------------------|--------------------------------------------------------------------------------------------------------------------------|
| rs139599160        | V10G            | Heterozygous              | N-terminus | IGHD <sup>14</sup>                    | Lower GHRHR gene expression at cellular surface <sup>14</sup>                                                            |
| 16959974           | A45T            | Homozygous                | N-terminus | Colorectal cancer <sup>15</sup>       | NR                                                                                                                       |
| 8391647            | D60G<br>(mouse) | Homozygous                | N-terminus | <i>Little mouse</i> <sup>16, 17</sup> | Functionally defective and unable to transduce GRF-dependent increases in intracellular cAMP levels <sup>16</sup>        |
| rs1319200922       | C64G            | Homozygous                | N-terminus | IGHD <sup>18</sup>                    | NR                                                                                                                       |
| rs775025721        | S70A            | Unknown <sup>a</sup>      | N-terminus | IGHD <sup>b</sup>                     | NR                                                                                                                       |
| rs121918117        | E72K            | Homozygous                | N-terminus | IGHD                                  | NR                                                                                                                       |
| rs776859854        | P77L            | Unknown <sup>a</sup>      | N-terminus | Not provided <sup>c</sup>             | NR                                                                                                                       |
| rs765640577        | P79L            | Homozygous                | N-terminus | IGHD <sup>19</sup>                    | Reduction in activity and the altered affinity <sup>19</sup>                                                             |
| rs200848306        | R94Q            | Homozygous                | N-terminus | IGHD <sup>20</sup>                    | Complete loss of function <sup>20</sup>                                                                                  |
| rs376258046        | R94L            | Homozygous                | N-terminus | IGHD <sup>21</sup>                    | NR                                                                                                                       |
| rs376258046        | R94W            | Heterozygous              | N-terminus | IGHD <sup>22</sup>                    | NR                                                                                                                       |
| 30266296           | C112Y           | Heterozygous              | N-terminus | IGHD <sup>23</sup>                    | NR                                                                                                                       |
| rs4988498          | E121D           | Homozygous                | 1.31       | IGHD <sup>14, 24</sup>                | Close to WT                                                                                                              |
| 23602557           | G136V           | Heterozygous              | 1.46       | IGHD <sup>25</sup>                    | Elicited no luciferase activity increment in response to GHRH stimulation, with normal membrane expression <sup>25</sup> |
| rs1311381263       | H137L           | Heterozygous              | 1.47       | IGHD <sup>26</sup>                    | Failed to increase cAMP after treatment with GHRH <sup>26, 27</sup>                                                      |
| rs606231412        | S140P           | Homozygous <sup>b</sup>   | 1.50       | IGHD <sup>d</sup>                     | NR                                                                                                                       |
| rs121918118        | L144H           | Homozygous                | 1.54       | IGHD <sup>20, 28</sup>                | Failed to show a cAMP response after treatment of the cells with GHRH <sup>20, 27, 28, 29</sup>                          |
| rs779187338        | A153D           | Homozygous                | 1.63       | IGHD <sup>20</sup>                    | Complete loss of function <sup>20</sup>                                                                                  |
| rs758798716        | R161W           | Homozygous                | 2.46       | IGHD <sup>20, 21</sup>                | Complete loss of function <sup>20</sup>                                                                                  |
| rs746565662        | N162I           | Unknown <sup>a</sup>      | 2.47       | IGHD <sup>b</sup>                     | NR                                                                                                                       |
| rs886043578        | N162D           | Heterozygous <sup>b</sup> | 2.47       | Not provided <sup>c</sup>             | NR                                                                                                                       |
| rs1045584744       | V164A           | Homozygous                | 2.49       | IGHD <sup>20</sup>                    | Complete loss of function <sup>20</sup>                                                                                  |
| rs606231413        | H165Q           | Heterozygous <sup>b</sup> | 2.50       | IGHD <sup>d</sup>                     | NR                                                                                                                       |
| rs570281194        | F169L           | Heterozygous              | 2.54       | IGHD <sup>20</sup>                    | Partial but significant loss of function <sup>20</sup>                                                                   |
| rs10227922         | T171S           | Heterozygous              | 2.56       | IGHD <sup>b,d</sup>                   | NR                                                                                                                       |
| rs774281185        | A176V           | Homozygous                | 2.61       | IGHD <sup>20, 30, 31</sup>            | Significantly reduced cAMP response <sup>20, 27, 30</sup>                                                                |
| rs765740795        | A184P           | Heterozygous              | 2.69       | Not provided <sup>c</sup>             | NR                                                                                                                       |
| rs535947130        | M214V           | Unknown <sup>a</sup>      | 3.41       | IGHD <sup>b</sup>                     | NR                                                                                                                       |
| rs121918120        | A222E           | Homozygous                | 3.49       | IGHD <sup>21, 28</sup>                | Failed to show a cAMP response after treatment of the cells with GHRH <sup>27, 28</sup>                                  |

|              |       |                      |        |                                             |                                                                                         |
|--------------|-------|----------------------|--------|---------------------------------------------|-----------------------------------------------------------------------------------------|
| rs28371560   | V225I | Homozygous           | 3.52   | GH-producing pituitary tumors <sup>24</sup> | Reduced GHRH binding and similar cAMP elevation as WT <sup>24</sup>                     |
| rs121918119  | F242C | Heterozygous         | 4.42   | IGHD <sup>28</sup>                          | Failed to show a cAMP response after treatment of the cells with GHRH <sup>27, 28</sup> |
| rs1004753042 | P253L | Heterozygous         | 4.53   | IGHD <sup>23</sup>                          | NR                                                                                      |
| 25541890     | T257A | Homozygous           | 4.57   | IGHD <sup>32</sup>                          | NR                                                                                      |
| 31231873     | T259K | Heterozygous         | 4.59   | IGHD <sup>20</sup>                          | Complete loss of function <sup>20</sup>                                                 |
| 25541890     | K264E | Homozygous           | 4.64   | IGHD <sup>32</sup>                          | NR                                                                                      |
| rs547906129  | A271V | Unknown <sup>a</sup> | ECL2   | IGHD <sup>b</sup>                           | NR                                                                                      |
| 19567534     | W273S | Homozygous           | ECL2   | IGHD <sup>21</sup>                          | NR                                                                                      |
| rs1361718232 | W283R | Homozygous           | 5.37   | IGHD <sup>20</sup>                          | Complete loss of function <sup>20</sup>                                                 |
| rs527387367  | S292W | Unknown <sup>a</sup> | 5.46   | IGHD <sup>b</sup>                           | NR                                                                                      |
| rs748546851  | G294R | Heterozygous         | 5.48   | GH-producing pituitary tumors <sup>24</sup> | No cAMP stimulation by GHRH <sup>24</sup>                                               |
| rs200472991  | R305H | Unknown <sup>a</sup> | 5.59   | IGHD <sup>b</sup>                           | NR                                                                                      |
| 25541890     | S317T | Heterozygous         | ICL3   | IGHD <sup>32</sup>                          | NR                                                                                      |
| rs121918121  | K329E | Heterozygous         | 6.40   | IGHD <sup>33</sup>                          | Failed to show a cAMP response after treatment with GHRH <sup>27, 33</sup>              |
| rs752122561  | S330L | Homozygous           | 6.41   | IGHD <sup>32</sup>                          | NR                                                                                      |
| rs149182247  | P336L | Unknown <sup>a</sup> | 6.47   | Not provided <sup>c</sup>                   | NR                                                                                      |
| rs794727020  | D350G | Heterozygous         | ECL3   | Not provided <sup>c</sup>                   | NR                                                                                      |
| rs376948691  | R357C | Homozygous           | 7.38   | IGHD <sup>29</sup>                          | Complete inactivity <i>in vitro</i> <sup>29</sup>                                       |
| 25541890     | G369V | Homozygous           | 7.50   | IGHD <sup>32</sup>                          | NR                                                                                      |
| 31231873     | I387T | Homozygous           | 8.54   | IGHD <sup>20</sup>                          | Complete loss of function <sup>20</sup>                                                 |
| rs2228078    | M422T | Heterozygous         | C-term | IGHD <sup>b</sup>                           | NR                                                                                      |

254 <sup>a</sup>The zygosity information of the disease-causing mutation in ClinVar is not provided.

255 <sup>b</sup>The mutation submitted by Illumina Clinical Services Laboratory.

256 <sup>c</sup>The disease information associated with the mutation in ClinVar is not provided.

257 <sup>d</sup>The mutation submitted by Endocrinology Clinic, Seth G.S. Medical College.

258 To date, 49 human GHRHR disease-causing natural missense mutations were reported (Fig. 4A),  
259 and 41 of them are either caused or associated with IGHD, a disease that affects the production,  
260 release and functional activity of GH leading to short stature. Based on the occurring positions,  
261 these mutations were mapped into the GHRHR structure with four classes: ECD region (11  
262 mutations), ligand-binding pocket (11 mutations), G protein coupling region (13 mutations), and  
263 the central region connecting ligand-binding and G protein-coupling (the connector, 14  
264 mutations). To collect disease-causing mutations for GHRHR, we performed database integration  
265 (Uniport, OMIM, Ensembl, ClinVar and HGMD) and literature investigation. In addition to the  
266 missense mutants described in the text, several assumed disease-causing mutations with  
267 undefined clinical significance, such as A271V and S292W, were also studied which neither  
268 affected GHRH-induced cAMP accumulation nor influenced  $\beta$ -arrestin2 recruitment, implying  
269 that they might be part of GHRHR polymorphism. WT, wild-type; IGHD, isolated growth hormone  
270 deficiency; NR, not reported. Orange shadow rows indicate missense mutants that were  
271 functionally studied and four of them marked in red were evaluated with MD simulations.

272  
273  
274

**Supplementary Table 6.** List of primers sequences for site-direct mutagenesis studies, related to Figs. 2, 4, 5, Supplementary Figs. 6, 8 and Supplementary Tables 4, 5.

| Oligonucleotide name             | Oligonucleotide sequence (5'-3')                | Cloning method           | Product                                             |
|----------------------------------|-------------------------------------------------|--------------------------|-----------------------------------------------------|
| GHRHR(23-405)-forward            | TCTTCTGCCTGGTATTGCCCCACATGCACC<br>CAGAATGTGACT  | Homologous recombination | pFastBac-GHRHR(23-405)                              |
| GHRHR(23-405)-reverse            | TACAGATTCTCTGAACCTCCACGGGTCCTC<br>CAGGCTGG      |                          |                                                     |
| Linear-pFastBac-forward          | GGAGGTTTCAGAGAATCTGTACTTCCA                     |                          |                                                     |
| Linear-pFastBac-reverse          | GGCGAATACCAGGCAGAAGA                            |                          |                                                     |
| GHRHR(23-405)-LgBiT-forward      | TCTTCTGCCTGGTATTGCCCCACATGCACC<br>CAGAATGTGACT  |                          | pFastBac-GHRHR(23-405)-15AA-LgBiT                   |
| GHRHR(23-405)-LgBiT-reverse      | CCGCCACCACCGCTCGAGCCACGGGTCCTC<br>CAGGCTGG      |                          |                                                     |
| Linear-pFastBac-LgBiT-forward    | GGCTCGAGCGGTGGTGGC                              |                          |                                                     |
| Linear-pFastBac-LgBiT-reverse    | GGCGAATACCAGGCAGAAGA                            |                          |                                                     |
| pBiT-GHRHR(23-405)-forward       | CCACAGGTGTCCACTCCGAGCACATGCAC<br>CCAGAATGTGACT  | Homologous recombination | pBiT-GHRHR(23-405)-LgBiT & pBiT-GHRHR(23-423)-LgBiT |
| pBiT-GHRHR(23-405)-reverse       | AAATCTTCGAGTGTGAAGACACGGGTCCT<br>CCAGGCTGG      |                          |                                                     |
| pBiT-GHRHR(23-423)-forward       | CCACAGGTGTCCACTCCGAGCACATGCAC<br>CCAGAATGTGACT  |                          |                                                     |
| pBiT-GHRHR(23-423)-reverse       | AAATCTTCGAGTGTGAAGACGCACATAGA<br>TGTCAGCACCTTTG |                          |                                                     |
| Linear-pBiT-forward              | GTCTTCACACTCGAAGATTTTCGTTG                      |                          |                                                     |
| Linear-pBiT-reverse              | CTCGGAGTGGACACCTGTGG                            |                          |                                                     |
| pBiT-GHRHR(23-405)-LgBiT-forward | CCACAGGTGTCCACTCCGAGCACATGCAC<br>CCAGAATGTGACT  |                          | pBiT-GHRHR(23-405)-15AA-LgBiT                       |
| pBiT-GHRHR(23-405)-LgBiT-reverse | CCGCCACCACCGCTCGAGCCACGGGTCCTC<br>CAGGCTGG      |                          |                                                     |
| Linear-pBiT-LgBiT-forward        | GGCTCGAGCGGTGGTGGC                              |                          |                                                     |
| Linear-pBiT-LgBiT-reverse        | CTCGGAGTGGACACCTGTGG                            |                          |                                                     |
| pcDNA3.1-                        | CCGGCAGCGCCGGCAGCGCCACATGCAC                    | Homologous               | pcDNA3.1-                                           |



|                                      |                                                   |                           |                                                                                 |
|--------------------------------------|---------------------------------------------------|---------------------------|---------------------------------------------------------------------------------|
| GHRHR(23-405)-forward                | CCAGAATGTGACT                                     | recombination             | GHRHR(23-405) & pcDNA3.1-GHRHR(23-423) & pcDNA3.1-GHRHR(23-405)-15AA-LgBiT-2MBP |
| pcDNA3.1-GHRHR(23-405)-reverse       | TGCTGGATATCTGCAGAATTCTAACGGGT<br>CCTCCAGGCTG      |                           |                                                                                 |
| pcDNA3.1-GHRHR(23-423)-forward       | CCGGCAGCGCCGGCAGCGCCCACATGCAC<br>CCAGAATGTGACT    |                           |                                                                                 |
| pcDNA3.1-GHRHR(23-423)-reverse       | TGCTGGATATCTGCAGAATTCTAGCACATA<br>GATGTCAGCACCTTT |                           |                                                                                 |
| pcDNA3.1-GHRHR(23-405)-LgBiT-forward | CCGGCAGCGCCGGCAGCGCCCACATGCAC<br>CCAGAATGTGACT    |                           |                                                                                 |
| pcDNA3.1-GHRHR(23-405)-LgBiT-reverse | GGATATCTGCAGAATTCTTACTTGGTGAT<br>ACGAGTCTGCGC     |                           |                                                                                 |
| Linear-pcDNA3.1-forward              | TAAGAATTCTGCAGATATCCAGCAC                         |                           |                                                                                 |
| Linear-pcDNA3.1-reverse              | GGCGCTGCCGGCGCTGCC                                |                           |                                                                                 |
| pcDNA3.1-GHRHR(23-423)-Rluc8-forward | CCGGCAGCGCCGGCAGCGCCCACATGCAC<br>CCAGAATGTGACT    | Homologous recombination  | pcDNA3.1-GHRHR(23-423)-Rluc8                                                    |
| pcDNA3.1-GHRHR(23-423)-Rluc8-reverse | TTGTACAAGAAAGCTGGGTTCGCACATAGA<br>TGTCAGCACCTTTG  |                           |                                                                                 |
| Linear-pcDNA3.1-Rluc8-forward        | GACCCAGCTTTCTTGTACAAAGTG                          |                           |                                                                                 |
| Linear-pcDNA3.1-Rluc8-reverse        | GGCGCTGCCGGCGCTGCC                                |                           |                                                                                 |
| L119A-forward                        | TGGCGCTGAGGAGGAATCTTACTTCTCC<br>ACA               | Site-directed mutagenesis | pcDNA3.1-GHRHR(23-423)-L119A                                                    |
| L119A-reverse                        | TTCTCCTCAGCCGCGCTCCAGAGGCA<br>CAGGG               |                           | pcDNA3.1-GHRHR(23-423)-E122A                                                    |
| E122A-forward                        | GCTGAGGCGGAATCTTACTTCTCCACAGT<br>GAAGATTAT        |                           | pcDNA3.1-GHRHR(23-423)-E123A                                                    |
| E122A-reverse                        | TAAGATCCGCCTCAGCCAGCAGCTCCAG<br>AGG               |                           | pcDNA3.1-                                                                       |
| E123A-forward                        | TGAGGAGGCATCTTACTTCTCCACAGTGA<br>AGATTATCTAC      |                           |                                                                                 |
| E123A-reverse                        | AGTAAGATGCCTCCTCAGCCAGCAGCTCC<br>AGA              |                           |                                                                                 |
| F126A-forward                        | ATCTTACGCCTCCACAGTGAAGATTATCTA                    |                           |                                                                                 |

|               |                                           |  |                                      |
|---------------|-------------------------------------------|--|--------------------------------------|
|               | CACCG                                     |  | GHRHR(23-423)-<br>F126A              |
| F126A-reverse | CTGTGGAGGCGTAAGATTCCTCCTCAGCC<br>AGCA     |  |                                      |
| V129A-forward | CTCCACAGCGAAGATTATCTACACCGTGG<br>GCC      |  | pcDNA3.1-<br>GHRHR(23-423)-<br>V129A |
| V129A-reverse | TAATCTTCGCTGTGGAGAAGTAAGATTCC<br>TCCTCA   |  |                                      |
| V179A-forward | CTGCGTTCCTGAAGGATGCTGCCCTTTTC<br>CAC      |  | pcDNA3.1-<br>GHRHR(23-423)-<br>V179A |
| V179A-reverse | ATCCTTCAGGAACGCAGCTCCCGCCTTGA<br>GGATAA   |  |                                      |
| K182A-forward | TGTTCCCTGGCGGATGCTGCCCTTTTCCAC<br>AGC     |  | pcDNA3.1-<br>GHRHR(23-423)-<br>K182A |
| K182A-reverse | AGCATCCGCCAGGAACACAGCTCCCGCCT<br>TGA      |  |                                      |
| F187A-forward | TGCTGCCCTTGCCACAGCGACGACTG<br>ACCA        |  | pcDNA3.1-<br>GHRHR(23-423)-<br>F187A |
| F187A-reverse | TGTGGGCAAGGGCAGCATCCTTCAGGAAC<br>ACA      |  |                                      |
| T192A-forward | GCTGACCACTGCAGCTTCTCCACTGTTCT<br>ATG      |  | pcDNA3.1-<br>GHRHR(23-423)-<br>T192A |
| T192A-reverse | AAGCTGCAGTGGTCAGCGTCGTCGCTGTG<br>GAAAAGGG |  |                                      |
| D193A-forward | ACTGCCCCTGCAGCTTCTCCACTGTTCTA<br>TG       |  | pcDNA3.1-<br>GHRHR(23-423)-<br>D193A |
| D193A-reverse | AAGCTGCAGTGGGCAGTGTGTCGTCGCTGTG<br>GAAAAG |  |                                      |
| H194A-forward | ACTGACGCCTGCAGCTTCTCCACTGTTCT<br>ATGC     |  | pcDNA3.1-<br>GHRHR(23-423)-<br>H194A |
| H194A-reverse | AAGCTGCAGGCGTCAGTGTGTCGTCGCTGTG<br>GAA    |  |                                      |
| C195A-forward | TGACCACGCCAGCTTCTCCACTGTTCTATG<br>CAAG    |  | pcDNA3.1-<br>GHRHR(23-423)-<br>C195A |
| C195A-reverse | AGAAGCTGGCGTGGTCAGTGTGTCGTCGCTG<br>TGG    |  |                                      |
| S209A-forward | GCCATTTCGCCACCATGACCAACTTCAG<br>CTG       |  | pcDNA3.1-<br>GHRHR(23-423)-<br>S209A |
| S209A-reverse | ATGGTGGCGAAATGGGCGGCGGCCACAGA<br>GACCTT   |  |                                      |
| H210A-forward | TCCGCTTTCGCCACCATGACCAACTTCAG<br>CTG      |  | pcDNA3.1-<br>GHRHR(23-423)-<br>H210A |
| H210A-reverse | ATGGTGGCGAAAGCGGAGGCGGCCACAGA<br>GAC      |  |                                      |

|               |                                          |  |                                      |
|---------------|------------------------------------------|--|--------------------------------------|
| T213A-forward | CGCCATGACCAACTTCAGCTGGCTGTTGG<br>CAG     |  | pcDNA3.1-<br>GHRHR(23-423)-<br>T213A |
| T213A-reverse | TGAAGTTGGTCATGGCGGCGAAATGGGAG<br>GCGGC   |  |                                      |
| A271R-forward | TTCGAGGACATCCGGTGCTGGGACCTGGA<br>CGACA   |  | pcDNA3.1-<br>GHRHR(23-423)-<br>A271A |
| A271R-reverse | CACCGGATGTCCTCGAAGGCCAGTTTGCA<br>GCT     |  |                                      |
| A271F-forward | GGACATCTTTTGCTGGGACCTGGACGACA<br>CCT     |  | pcDNA3.1-<br>GHRHR(23-423)-<br>A271F |
| A271F-reverse | CCCAGCAAAGATGTCCTCGAAGGCCAGT<br>TTG      |  |                                      |
| D274A-forward | TGCTGGGCCCTGGACGACACCTCCCCCTAC<br>TG     |  | pcDNA3.1-<br>GHRHR(23-423)-<br>D274A |
| D274A-reverse | TCGTCCAGGGCCCAGCACGCGATGTCCTC<br>GAA     |  |                                      |
| D276A-forward | GGACCTGGCCGACACCTCCCCCTACTGGTG<br>GA     |  | pcDNA3.1-<br>GHRHR(23-423)-<br>D276A |
| D276A-reverse | AGGTGTCGGCCAGTCCCAGCACGCGATG<br>TCC      |  |                                      |
| W282A-forward | CTACGCGTGGATCATCAAAGGGCCCATTG<br>TCC     |  | pcDNA3.1-<br>GHRHR(23-423)-<br>W282A |
| W282A-reverse | TGATGATCCACGCGTAGGGGGAGGTGTCG<br>TCCA    |  |                                      |
| K286A-forward | ACTGGTGGATCGCCAAAGGGCCCATTGTC<br>CTCTC   |  | pcDNA3.1-<br>GHRHR(23-423)-<br>K286A |
| K286A-reverse | TTTGGCGATCCACCAGTAGGGGGAGGTGT<br>CGT     |  |                                      |
| I285A-forward | ACTGGTGGATCATCGCAGGGCCCATTGTC<br>CTCTCG  |  | pcDNA3.1-<br>GHRHR(23-423)-<br>I285A |
| I285A-reverse | TGCGATGATCCACCAGTAGGGGGAGGTGT<br>CGT     |  |                                      |
| I289A-forward | ATCAAAGGGCCCGCTGTCTCTCGGTCCG<br>GGTG     |  | pcDNA3.1-<br>GHRHR(23-423)-<br>I289A |
| I289A-reverse | ACAGCGGGCCCTTTGATGATCCACCAGTA<br>GGG     |  |                                      |
| N346A-forward | TCATCTTCGCCTTCCCTGCCAGACAATGCT<br>GGC    |  | pcDNA3.1-<br>GHRHR(23-423)-<br>N346A |
| N346A-reverse | CAGGAAGGCGAAGATGATGTAGTGAATTC<br>CAAAGAG |  |                                      |
| D350A-forward | ACTTCCTGCCAGCCAATGCTGGCCTGGGC<br>ATC     |  | pcDNA3.1-<br>GHRHR(23-423)-<br>D350A |
| D350A-reverse | ATTGGCTGGCAGGAAGTTGAAGATGATGT<br>AGT     |  |                                      |

|               |                                         |  |                                      |
|---------------|-----------------------------------------|--|--------------------------------------|
| L354A-forward | AATGCTGGCGCGGGCATCCGCCTCCCCCT<br>GGA    |  | pcDNA3.1-<br>GHRHR(23-423)-<br>L354A |
| L354A-reverse | ATGCCC GCGCCAGCATTTGTCTGGCAGGAA<br>GTT  |  |                                      |
| R357A-forward | ATCGCCCTCCCCCTGGAGCTGGGACTGGG<br>TTC    |  | pcDNA3.1-<br>GHRHR(23-423)-<br>R357A |
| R357A-reverse | TCCAGGGGGAGGGCGATGCCAGGCCAGC<br>ATT     |  |                                      |
| L358A-forward | ATCCGCGCCCCCTGGAGCTGGGACTGGG<br>TTC     |  | pcDNA3.1-<br>GHRHR(23-423)-<br>L358A |
| L358A-reverse | TCCAGGGGGGCGCGGATGCCAGGCCAGC<br>ATT     |  |                                      |
| E361A-forward | TGGCGCTGGGACTGGGTTCTTCCAGGGC<br>TTC     |  | pcDNA3.1-<br>GHRHR(23-423)-<br>E361A |
| E361A-reverse | ACCCAGTCCCAGCGCCAGGGGGAGGCGGA<br>TGCC   |  |                                      |
| L362A-forward | GCGGGACTGGGTTCTTCCAGGGCTTCAT<br>TGT     |  | pcDNA3.1-<br>GHRHR(23-423)-<br>L362A |
| L362A-reverse | AAGGAACCCAGTCCCGCCTCCAGGGGGAG<br>GCGGAT |  |                                      |
| R156A-forward | TCTCAGGGCGCTCCACTGCCCCCGAACT<br>ACG     |  | pcDNA3.1-<br>GHRHR(23-423)-<br>R156A |
| R156A-reverse | AGTGGAGCGCCCTGAGAGCAACCAGGATG<br>GTG    |  |                                      |
| E386A-forward | TGAGGACTGCGATCTCACGGAAGTGGCAT<br>GGC    |  | pcDNA3.1-<br>GHRHR(23-423)-<br>E386A |
| E386A-reverse | TGAGATCGCAGTCCTCACCTTTGGTTGA<br>GGA     |  |                                      |
| R389A-forward | AGATCTCAGCGAAGTGGCATGGCCATGAC<br>CCT    |  | pcDNA3.1-<br>GHRHR(23-423)-<br>R389A |
| R389A-reverse | CCACTTCGCTGAGATCTCAGTCCTCACCTC<br>TTG   |  |                                      |
| G393R-forward | AAGTGGCATCGCCATGACCCTGAGCTTCT<br>GCC    |  | pcDNA3.1-<br>GHRHR(23-423)-<br>G393R |
| G393R-reverse | TCATGGCGATGCCACTTCCGTGAGATCTC<br>AGT    |  |                                      |
| D60G-forward  | ACCTGGGGTGGGCTGCTGTGCTGGCCAAC<br>GGC    |  | pcDNA3.1-<br>GHRHR(23-423)-<br>D60G  |
| D60G-reverse  | AGCAGCCCACCCAGGTCGCAGGGCAGCC<br>CAG     |  |                                      |
| E72K-forward  | CTCTGGCAAGTGGGTCACCCTCCCCTGCC<br>CGG    |  | pcDNA3.1-<br>GHRHR(23-423)-<br>E72K  |
| E72K-reverse  | TGACCCACTTGCCAGAGCCTGCCGTTGGC<br>CAG    |  |                                      |

|               |                                           |  |                                            |
|---------------|-------------------------------------------|--|--------------------------------------------|
| P77L-forward  | CTCTGCCCCGGATTTCTTCTCTCACTTCAGC<br>TC     |  | pcDNA3.1-<br>GHRHR(23-423)-<br>P77L &      |
| P77L-reverse  | AAGAAATCCGGGCAGAGGAGGGTGACCCA<br>CTCGCC   |  | pcDNA3.1-<br>GHRHR(23-423)-<br>Rluc8-P77L  |
| R94Q-forward  | GCTGTGAAACAGGATTGTACTATCACTGG<br>CTGGTCTG |  | pcDNA3.1-<br>GHRHR(23-423)-<br>R94Q &      |
| R94Q-reverse  | CAATCCTGTTTCACAGCCCCTGACTCTGA<br>GCT      |  | pcDNA3.1-<br>GHRHR(23-423)-<br>Rluc8-R94Q  |
| S140P-forward | AGCATCCCTATTGTAGCCCTCTTCGTGGCC<br>AT      |  | pcDNA3.1-<br>GHRHR(23-423)-<br>S140P &     |
| S140P-reverse | GCTACAATAGGGATGCTATGGCCACGGT<br>GTA       |  | pcDNA3.1-<br>GHRHR(23-423)-<br>Rluc8-S140P |
| N162I-forward | ATCTACGTCCACACCCAGCTGTTCACCACT<br>TT      |  | pcDNA3.1-<br>GHRHR(23-423)-<br>N162I &     |
| N162I-reverse | TGGGTGTGGACGTAGATCCGGGGGCAGTG<br>GAGCCT   |  | pcDNA3.1-<br>GHRHR(23-423)-<br>Rluc8-N162I |
| N162D-forward | GACTACGTCCACACCCAGCTGTTCACCACT<br>TT      |  | pcDNA3.1-<br>GHRHR(23-423)-<br>N162D &     |
| N162D-reverse | TGGGTGTGGACGTAGTCCGGGGGCAGTG<br>GAGCCT    |  | pcDNA3.1-<br>GHRHR(23-423)-<br>Rluc8-N162D |
| H165Q-forward | ACTACGTCCAAACCCAGCTGTTCACCACT<br>TTTATC   |  | pcDNA3.1-<br>GHRHR(23-423)-<br>H165Q &     |
| H165Q-reverse | CTGGGTTTGGACGTAGTTCGGGGGCAGT<br>GGA       |  | pcDNA3.1-<br>GHRHR(23-423)-<br>Rluc8-H165Q |
| T171S-forward | CAGCTGTTCACCTCTTTTATCCTCAAGGC<br>GGGAGC   |  | pcDNA3.1-<br>GHRHR(23-423)-<br>T171S &     |
| T171S-reverse | AAAGAGGTGAACAGCTGGGTGTGGACGTA<br>GTT      |  | pcDNA3.1-<br>GHRHR(23-423)-<br>Rluc8-T171S |
| A176V-forward | TATCCTCAAGGTGGGAGCTGTGTTCTGA<br>AGGATG    |  | pcDNA3.1-<br>GHRHR(23-423)-                |

|                 |                                           |                                                       |
|-----------------|-------------------------------------------|-------------------------------------------------------|
| A176V-reverse   | CTCCACCTTGAGGATAAAAGTGGTGAAC<br>AGC       | A176V &<br>pcDNA3.1-<br>GHRHR(23-423)-<br>Rluc8-A176V |
| M214V-forward   | CACCGTGACCAACTTCAGCTGGCTGTTGG<br>CAG      | pcDNA3.1-<br>GHRHR(23-423)-<br>M214V &                |
| M214V-reverse   | TGAAGTTGGTCACGGTGGCGAAATGGGAG<br>GCG      | pcDNA3.1-<br>GHRHR(23-423)-<br>Rluc8-M214V            |
| A271V-forward   | TTCGAGGACATCGTGTGCTGGGACCTGGA<br>CGACA    | pcDNA3.1-<br>GHRHR(23-423)-<br>A271V &                |
| A271V-reverse   | CACACGATGTCCTCGAAGGCCAGTTTGCA<br>GCT      | pcDNA3.1-<br>GHRHR(23-423)-<br>Rluc8-A271V            |
| S292W-forward   | ATTGTCCTCTGGGTGCGGGTGAAC TTTGG<br>GCT     | pcDNA3.1-<br>GHRHR(23-423)-<br>S292W &                |
| S292W-reverse   | CCGACCCAGAGGACAATGGGCCCTTTGAT<br>GAT      | pcDNA3.1-<br>GHRHR(23-423)-<br>Rluc8-S292W            |
| P336L-forward   | CCTGATCCTACTCTTTGGAATTCACTACAT<br>CATCTTC | pcDNA3.1-<br>GHRHR(23-423)-<br>P336L &                |
| P336L-reverse   | CAAAGAGTAGGATCAGGAAAAGTGTGCAC<br>TTGG     | pcDNA3.1-<br>GHRHR(23-423)-<br>Rluc8-P336L            |
| R357C-forward   | ATCTGCCTCCCCCTGGAGCTGGGACTGGG<br>TTC      | pcDNA3.1-<br>GHRHR(23-423)-<br>R357C &                |
| R357C-reverse   | TCCAGGGGGAGGCAGATGCCAGGCCAGC<br>ATT       | pcDNA3.1-<br>GHRHR(23-423)-<br>Rluc8-R357C            |
| 119-423-forward | CTGGCTGAGGAGGAATCTTACTTCTCCAC<br>AGTG     | pcDNA3.1-<br>GHRHR(119-423)                           |
| 119-423-reverse | AGATTCCTCCTCAGCCAGGGCGCTGCCGG<br>CGCTGCC  |                                                       |



276 **References**

- 277 1. Hall MP, *et al.* Engineered luciferase reporter from a deep sea shrimp utilizing a novel  
278 imidazopyrazinone substrate. *ACS Chem Biol* **7**, 1848-1857 (2012).
- 279 2. Dixon AS, *et al.* NanoLuc complementation reporter optimized for accurate measurement of  
280 protein interactions in cells. *ACS Chem Biol* **11**, 400-408 (2016).
- 281 3. Inoue A, *et al.* Illuminating G-protein-coupling selectivity of GPCRs. *Cell* **177**, 1933-  
282 1947.e1925 (2019).
- 283 4. Duan J, *et al.* Cryo-EM structure of an activated VIP1 receptor-G protein complex revealed by  
284 a NanoBiT tethering strategy. *Nat Commun* (2020).
- 285 5. Zhang Y, *et al.* Cryo-EM structure of the activated GLP-1 receptor in complex with a G protein.  
286 *Nature* **546**, 248-253 (2017).
- 287 6. Liang YL, *et al.* Phase-plate cryo-EM structure of a biased agonist-bound human GLP-1  
288 receptor-Gs complex. *Nature* **555**, 121-125 (2018).
- 289 7. Jazayeri A, *et al.* Crystal structure of the GLP-1 receptor bound to a peptide agonist. *Nature* **546**,  
290 254-258 (2017).
- 291 8. Wu F, *et al.* Full-length human GLP-1 receptor structure without orthosteric ligands. *Nat*  
292 *Commun* **11**, 1272 (2020).
- 293 9. Zhou Q, *et al.* Common activation mechanism of class A GPCRs. *Elife* **8**, 31 (2019).
- 294 10. Wootten D, Simms J, Miller LJ, Christopoulos A, Sexton PM. Polar transmembrane interactions  
295 drive formation of ligand-specific and signal pathway-biased family B G protein-coupled  
296 receptor conformations. *Proc Natl Acad Sci U S A* **110**, 5211-5216 (2013).
- 297 11. Isberg V, *et al.* Generic GPCR residue numbers - aligning topology maps while minding the  
298 gaps. *Trends Pharmacol Sci* **36**, 22-31 (2015).
- 299 12. Zhao LH, *et al.* Structure and dynamics of the active human parathyroid hormone receptor-1.  
300 *Science* **364**, 148-153 (2019).
- 301 13. Pal K, Melcher K, Xu HE. Structure and mechanism for recognition of peptide hormones by  
302 Class B G-protein-coupled receptors. *Acta Pharmacol Sin* **33**, 300-311 (2012).
- 303 14. Godi M, *et al.* A recurrent signal peptide mutation in the growth hormone releasing hormone  
304 receptor with defective translocation to the cell surface and isolated growth hormone deficiency.  
305 *J Clin Endocrinol Metab* **94**, 3939-3947 (2009).
- 306 15. Sjoblom T, *et al.* The consensus coding sequences of human breast and colorectal cancers.  
307 *Science* **314**, 268-274 (2006).
- 308 16. Lin SC, Lin CR, Gukovsky I, Lusic AJ, Sawchenko PE, Rosenfeld MG. Molecular basis of the  
309 little mouse phenotype and implications for cell type-specific growth. *Nature* **364**, 208-213  
310 (1993).
- 311 17. Godfrey P, Rahal JO, Beamer WG, Copeland NG, Jenkins NA, Mayo KE. GHRH receptor of  
312 little mice contains a missense mutation in the extracellular domain that disrupts receptor  
313 function. *Nature Genet* **4**, 227-232 (1993).
- 314 18. Demirbilek H, *et al.* Familial isolated growth hormone deficiency due to a novel homozygous  
315 missense mutation in the growth hormone releasing hormone receptor gene: clinical  
316 presentation with hypoglycemia. *J Clin Endocrinol Metab* **99**, E2730-2734 (2014).
- 317 19. Gregory LC, *et al.* Partial loss of function of the GHRH receptor leads to mild growth hormone  
318 deficiency. *J Clin Endocrinol Metab* **101**, 3608-3615 (2016).
- 319 20. Cohen E, *et al.* Contribution of functionally assessed GHRHR mutations to idiopathic isolated

- 320 growth hormone deficiency in patients without GH1 mutations. *Hum Mutat* **40**, 2033-2043  
321 (2019).
- 322 21. Alatzoglou KS, *et al.* Expanding the spectrum of mutations in GH1 and GHRHR: genetic  
323 screening in a large cohort of patients with congenital isolated growth hormone deficiency. *J*  
324 *Clin Endocrinol Metab* **94**, 3191-3199 (2009).
- 325 22. Tommiska J, Jorgensen N, Christiansen P, Juul A, Raivio T. A homozygous R262Q mutation in  
326 the gonadotropin-releasing hormone receptor presenting as reversal of hypogonadotropic  
327 hypogonadism and late-onset hypogonadism. *Clin Endocrinol (Oxf)* **78**, 316-317 (2013).
- 328 23. Blum WF, *et al.* Screening a large pediatric cohort with GH deficiency for mutations in genes  
329 regulating pituitary development and GH secretion: Frequencies, phenotypes and growth  
330 outcomes. *EBioMedicine* **36**, 390-400 (2018).
- 331 24. Lee EJ, *et al.* Absence of constitutively activating mutations in the GHRH receptor in GH-  
332 producing pituitary tumors. *J Clin Endocrinol Metab* **86**, 3989-3995 (2001).
- 333 25. Soneda A, *et al.* Novel compound heterozygous mutations of the growth hormone-releasing  
334 hormone receptor gene in a case of isolated growth hormone deficiency. *Growth Horm IGF Res*  
335 **23**, 89-97 (2013).
- 336 26. Salvatori R, Fan X, Phillips JA, 3rd, Prince M, Levine MA. Isolated growth hormone (GH)  
337 deficiency due to compound heterozygosity for two new mutations in the GH-releasing  
338 hormone receptor gene. *Clin Endocrinol (Oxf)* **54**, 681-687 (2001).
- 339 27. Alba M, Salvatori R. Naturally-occurring missense mutations in the human growth hormone-  
340 releasing hormone receptor alter ligand binding. *J Endocrinol* **186**, 515-521 (2005).
- 341 28. Salvatori R, *et al.* Three new mutations in the gene for the growth hormone (gh)-releasing  
342 hormone receptor in familial isolated gh deficiency type ib. *J Clin Endocrinol Metab* **86**, 273-  
343 279 (2001).
- 344 29. Haskin O, *et al.* A new mutation in the growth hormone-releasing hormone receptor gene in two  
345 Israeli Arab families. *J Endocrinol Invest* **29**, 122-130 (2006).
- 346 30. Carakushansky M, *et al.* A new missense mutation in the growth hormone-releasing hormone  
347 receptor gene in familial isolated GH deficiency. *Eur J Endocrinol* **148**, 25-30 (2003).
- 348 31. Marui S, *et al.* GH-releasing hormone receptor gene: a novel splice-disrupting mutation and  
349 study of founder effects. *Horm Res Paediatr* **78**, 165-172 (2012).
- 350 32. Arman A, Dundar BN, Cetinkaya E, Erzaim N, Buyukgebiz A. Novel growth hormone-releasing  
351 hormone receptor gene mutations in Turkish children with isolated growth hormone deficiency.  
352 *J Clin Res Pediatr Endocrinol* **6**, 202-208 (2014).
- 353 33. Salvatori R, Fan XG, Mullis PE, Haile A, Levine MA. Decreased expression of the GHRH  
354 receptor gene due to a mutation in a Pit-1 binding site. *Mol Endocrinol* **16**, 450-458 (2002).
